# Supplementary material
Source: PubMed Central journal article supplement (PMC4139442)
Supplement: NIHMS592594-supplement-10142_2014_376_MOESM1_ESM.pdf [file NIHMS592594-supplement-10142_2014_376_MOESM1_ESM.pdf]

## **ONLINE RESOURCES**

### **Differential expression of genes in *Aedes aegypti* strains D2S3 and Moyo-D in response to dengue virus infection**

Susanta K. Behura, Consuelo Gomez-Machorro, Becky deBruyn, Diane D. Lovin, Brent W. Harker, Jeanne Romero-Severson, Akio Mori, David W. Severson\*

Eck Institute for Global Health, Department of Biological Sciences, University of Notre Dame, Notre Dame, IN, United States

\*Corresponding author at: Department of Biological Sciences, University of Notre Dame, Notre Dame, IN, 46556-5645, United States. Tel.: +1 574 360 6718; fax: +1 574 631 7413. E-mail address: [severson.1@nd.edu](mailto:severson.1@nd.edu) (D.W. Severson).

## Legends of Online Resources

**Online Resource 1.** Validation of microarray data by qRT-PCR. The columns in blue show the qRT-PCR expression levels of the 5 genes indicated in the X-axis as Moyo-D relative to D2S3 expression as shown in the Y-axis. The red columns show relative expression patterns (Moyo-D to D2S3 ratios) of the corresponding genes from the microarray data. Standard errors are indicated for each.

**Online Resource 2.** List of transcripts differentially expressed in time and strain specific manner. The cDNA ID and the VectorBase gene ID (if not annotated, GenBank Acc# of the cDNA) are provided for each DET. The strain in which the gene is up-regulated after infection is indicated. The specific time point where such up-regulated expression is observed is shown.

**Online Resource 3.** List of transcripts differentially expressed in different time (s) and strain (s), but not specific to a strain or time. List of DETs that are up-regulated at different times (3h or 3d) in different strains (D2S3 or Moyo-D). The cDNA ID and the VectorBase gene ID (if not annotated, GenBank Acc# of the cDNA) are provided for each DET. The strain in which the gene is up-regulated after infection is indicated. The specific time point where such up-regulated expression is observed is shown.

**Online Resource 4.** List of top 10 ranking gene ontology terms associated with differentially expressed genes in different strain (S: D2S3 or R: Moyo-D) and post-infection times (3hr or 3 day). The GO terms in blue color are specific to susceptible (D2S3) and those in black color are specific to refractory (Moyo-D) whereas those in red color are common in both.

**Online Resource 5.** List of differentially expressed genes mapping to KEGG pathways of *A. aegypti*.

**Online Resource 6.** List of transcripts which were differentially regulated between D2S3 and Moyo-D (current study) as well as between Moyo-S and Moyo-D (Chauhan *et al.* 2012).

## Online Resource 1

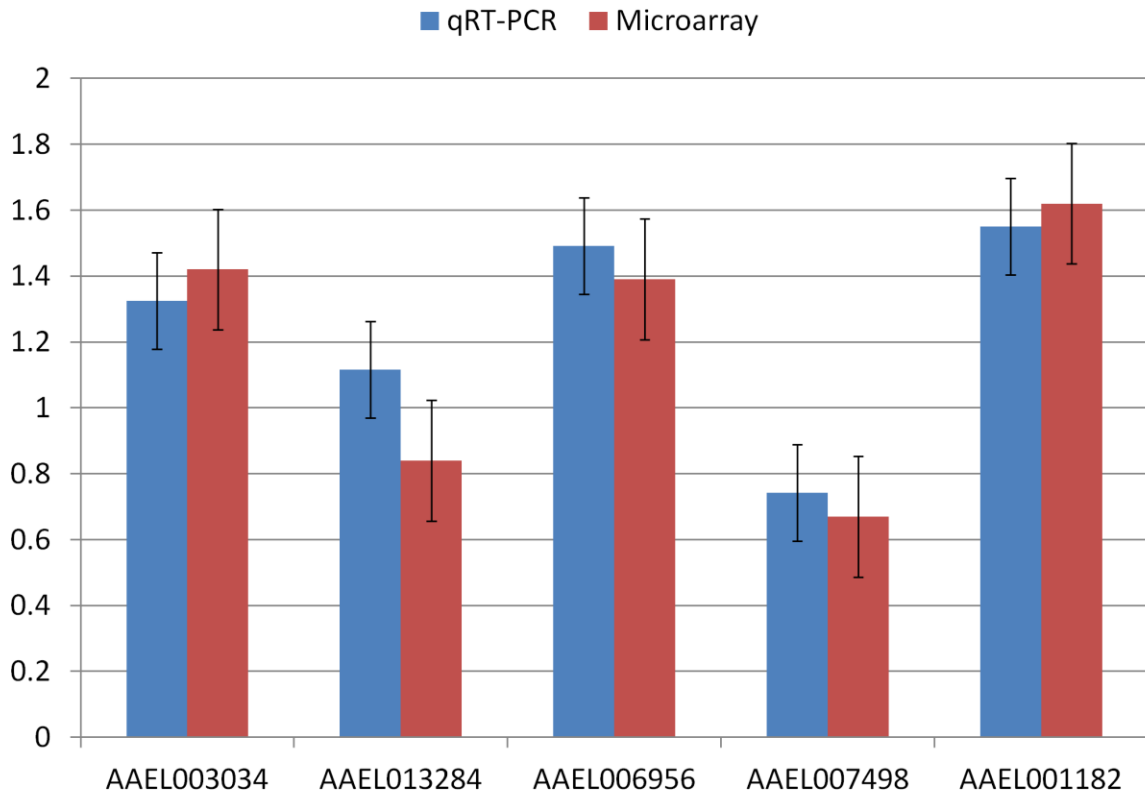

## **Online Resource 2**

| <b>cDNA ID</b> | <b>VectroBase/G A. aegypti strain</b> | <b>Post-infection time</b> |    |
|----------------|---------------------------------------|----------------------------|----|
| NAAFC38        | AAEL000101                            | D2S3                       | 3h |
| NAAFD21        | DV272290                              | D2S3                       | 3h |
| NAAFN71        | AAEL004861                            | D2S3                       | 3h |
| NAAFW75        | AAEL013933                            | D2S3                       | 3h |
| NAAFY09        | DV272983                              | D2S3                       | 3h |
| NAAFY23        | AAEL003789                            | D2S3                       | 3h |
| NAAG158        | DV283346                              | D2S3                       | 3h |
| NAAG217        | AAEL003525                            | D2S3                       | 3h |
| NAAG339        | AAEL004688                            | D2S3                       | 3h |
| NAAG654        | AAEL000550                            | D2S3                       | 3h |
| NAAG736        | AAEL000537                            | D2S3                       | 3h |
| NAAGF03        | DV282460                              | D2S3                       | 3h |
| NAAGI25        | AAEL010073                            | D2S3                       | 3h |
| NAAGI89        | AAEL007595                            | D2S3                       | 3h |
| NAAGJ40        | AAEL002214                            | D2S3                       | 3h |
| NAAGQ14        | AAEL012078                            | D2S3                       | 3h |
| NAAHG42        | AAEL000496                            | D2S3                       | 3h |
| NAAHL45        | AAEL007125                            | D2S3                       | 3h |
| NAAHO91        | AAEL006941                            | D2S3                       | 3h |
| NAAHS87        | DV287386                              | D2S3                       | 3h |
| NAAHU69        | AAEL006171                            | D2S3                       | 3h |
| NAAHX60        | AAEL004041                            | D2S3                       | 3h |
| NAAIA18        | AAEL007854                            | D2S3                       | 3h |
| NAAIA81        | AAEL004427                            | D2S3                       | 3h |
| NAAIB91        | AAEL006117                            | D2S3                       | 3h |
| NAAIF95        | AAEL014012                            | D2S3                       | 3h |
| NABMB10        | AAEL011801                            | D2S3                       | 3h |
| NABMD73        | DV292736                              | D2S3                       | 3h |
| NABMR17        | AAEL008400                            | D2S3                       | 3h |
| NABMY53        | AAEL009529                            | D2S3                       | 3h |
| NABMY86        | DV306599                              | D2S3                       | 3h |
| NABN147        | AAEL007288                            | D2S3                       | 3h |
| NABNK30        | AAEL002771                            | D2S3                       | 3h |
| NABNO03        | DV299450                              | D2S3                       | 3h |
| NABNO19        | DV299599                              | D2S3                       | 3h |
| NABNS16        | AAEL012740                            | D2S3                       | 3h |
| NABNS60        | AAEL007665                            | D2S3                       | 3h |
| NABNV89        | DV296749                              | D2S3                       | 3h |
| NABO015        | AAEL008882                            | D2S3                       | 3h |
| NABO194        | AAEL001142                            | D2S3                       | 3h |
| NABO278        | DV319302                              | D2S3                       | 3h |
| NABOA44        | AAEL004351                            | D2S3                       | 3h |
| NABOE35        | DV315507                              | D2S3                       | 3h |
| NABOF51        | AAEL000079                            | D2S3                       | 3h |
| NABOK41        | AAEL003419                            | D2S3                       | 3h |

|         |            |      |    |
|---------|------------|------|----|
| NABOO31 | DV314545   | D2S3 | 3h |
| NABP741 | AAEL000240 | D2S3 | 3h |
| NABP757 | DV308766   | D2S3 | 3h |
| NABPG39 | AAEL000620 | D2S3 | 3h |
| NABPK74 | AAEL002238 | D2S3 | 3h |
| NABPM17 | AAEL014931 | D2S3 | 3h |
| NABPQ23 | DV308433   | D2S3 | 3h |
| NABQ382 | DV301917   | D2S3 | 3h |
| NABQ594 | AAEL006864 | D2S3 | 3h |
| NABQD40 | AAEL011993 | D2S3 | 3h |
| NABQD57 | DV304640   | D2S3 | 3h |
| NABQF83 | AAEL005564 | D2S3 | 3h |
| NABR857 | AAEL006997 | D2S3 | 3h |
| NABRM26 | AAEL007767 | D2S3 | 3h |
| NABRM91 | AAEL013688 | D2S3 | 3h |
| NABRN55 | AAEL014868 | D2S3 | 3h |
| NABRQ37 | AAEL002389 | D2S3 | 3h |
| NABRR40 | DV323917   | D2S3 | 3h |
| NABRR55 | AAEL010598 | D2S3 | 3h |
| NABRR58 | AAEL004099 | D2S3 | 3h |
| NABRU44 | AAEL000443 | D2S3 | 3h |
| NABRU87 | DV324802   | D2S3 | 3h |
| NABRW43 | AAEL007063 | D2S3 | 3h |
| NABRY40 | DV325716   | D2S3 | 3h |
| NABRY64 | DV325853   | D2S3 | 3h |
| NABS029 | DV320340   | D2S3 | 3h |
| NABS195 | AAEL012247 | D2S3 | 3h |
| NABS384 | AAEL005069 | D2S3 | 3h |
| NABS904 | DV322849   | D2S3 | 3h |
| NABS968 | AAEL011737 | D2S3 | 3h |
| NABSD93 | DV333164   | D2S3 | 3h |
| NABSL84 | AAEL004971 | D2S3 | 3h |
| NABSV15 | DV332525   | D2S3 | 3h |
| NABSV81 | AAEL007796 | D2S3 | 3h |
| NABSW88 | DV329578   | D2S3 | 3h |
| NABTD93 | AAEL002723 | D2S3 | 3h |
| NABTF26 | AAEL008179 | D2S3 | 3h |
| NABTS34 | AAEL013072 | D2S3 | 3h |
| NABTU89 | DV342161   | D2S3 | 3h |
| NABTZ21 | AAEL013450 | D2S3 | 3h |
| NABU365 | DV339976   | D2S3 | 3h |
| NABU689 | AAEL015651 | D2S3 | 3h |
| NABUF31 | DV338929   | D2S3 | 3h |
| NABUF67 | AAEL010576 | D2S3 | 3h |
| NABUH83 | AAEL008198 | D2S3 | 3h |
| NABUI94 | AAEL008527 | D2S3 | 3h |
| NABUV81 | AAEL014915 | D2S3 | 3h |

|         |            |      |    |
|---------|------------|------|----|
| NABUY94 | AAEL007234 | D2S3 | 3h |
| NABV403 | DV336008   | D2S3 | 3h |
| NABV612 | AAEL003781 | D2S3 | 3h |
| NABV642 | AAEL009136 | D2S3 | 3h |
| NABV684 | DV336416   | D2S3 | 3h |
| NABW133 | DV347431   | D2S3 | 3h |
| NABW234 | DV347556   | D2S3 | 3h |
| NABW385 | DV347817   | D2S3 | 3h |
| NABW481 | DV347970   | D2S3 | 3h |
| NABW511 | DV348053   | D2S3 | 3h |
| NABW733 | AAEL005384 | D2S3 | 3h |
| NABW938 | AAEL002457 | D2S3 | 3h |
| NABWE56 | AAEL007669 | D2S3 | 3h |
| NABWF78 | AAEL007108 | D2S3 | 3h |
| NABWG67 | AAEL010099 | D2S3 | 3h |
| NABWM31 | DV346412   | D2S3 | 3h |
| NABWN47 | AAEL009373 | D2S3 | 3h |
| NABWQ53 | AAEL005629 | D2S3 | 3h |
| NABWS17 | AAEL004320 | D2S3 | 3h |
| NABWV49 | DV347018   | D2S3 | 3h |
| NABWW76 | AAEL006859 | D2S3 | 3h |
| NABWX22 | DV344675   | D2S3 | 3h |
| NABX239 | AAEL003844 | D2S3 | 3h |
| NABX360 | AAEL004237 | D2S3 | 3h |
| NABX673 | AAEL006862 | D2S3 | 3h |
| NABX728 | AAEL011449 | D2S3 | 3h |
| NABX944 | DV351939   | D2S3 | 3h |
| NABXB63 | AAEL011282 | D2S3 | 3h |
| NABXE43 | AAEL009112 | D2S3 | 3h |
| NABXH87 | AAEL012165 | D2S3 | 3h |
| NABXJ54 | AAEL003671 | D2S3 | 3h |
| NABXR15 | AAEL014035 | D2S3 | 3h |
| NABXR74 | DV349849   | D2S3 | 3h |
| NABXW42 | DV350613   | D2S3 | 3h |
| NABXX55 | AAEL008517 | D2S3 | 3h |
| NABY319 | AAEL009520 | D2S3 | 3h |
| NABY649 | DV355221   | D2S3 | 3h |
| NABY907 | AAEL001182 | D2S3 | 3h |
| NABYC21 | #N/A       | D2S3 | 3h |
| NABYC52 | AAEL012107 | D2S3 | 3h |
| NABYD18 | AAEL008704 | D2S3 | 3h |
| NABYE77 | AAEL006400 | D2S3 | 3h |
| NABZ008 | DV356692   | D2S3 | 3h |
| NABZ280 | AAEL006733 | D2S3 | 3h |
| NABZ439 | AAEL010414 | D2S3 | 3h |
| NABZ918 | AAEL001378 | D2S3 | 3h |
| NABZA54 | DV358323   | D2S3 | 3h |

|         |            |      |    |
|---------|------------|------|----|
| NABZE01 | AAEL008184 | D2S3 | 3h |
| NACA121 | DV363869   | D2S3 | 3h |
| NACA392 | AAEL004121 | D2S3 | 3h |
| NACA489 | AAEL002597 | D2S3 | 3h |
| NACAB41 | DV360095   | D2S3 | 3h |
| NACAD35 | DV360694   | D2S3 | 3h |
| NACAE65 | DV361143   | D2S3 | 3h |
| NACAG23 | AAEL002386 | D2S3 | 3h |
| NACAT70 | AAEL009754 | D2S3 | 3h |
| NACAU26 | AAEL007583 | D2S3 | 3h |
| NACB155 | AAEL005237 | D2S3 | 3h |
| NACB266 | AAEL010318 | D2S3 | 3h |
| NACB728 | AAEL000451 | D2S3 | 3h |
| NACB758 | #N/A       | D2S3 | 3h |
| NACBA83 | AAEL014913 | D2S3 | 3h |
| NACBB07 | AAEL011288 | D2S3 | 3h |
| NACBF67 | AAEL013633 | D2S3 | 3h |
| NACBH45 | AAEL002686 | D2S3 | 3h |
| NACBI10 | AAEL013907 | D2S3 | 3h |
| NACBS25 | AAEL009809 | D2S3 | 3h |
| NACBV28 | AAEL014749 | D2S3 | 3h |
| NACM122 | DV374808   | D2S3 | 3h |
| NACM241 | DV375037   | D2S3 | 3h |
| NACMG48 | DV372656   | D2S3 | 3h |
| NACMH09 | DV372753   | D2S3 | 3h |
| NACMH10 | DV372755   | D2S3 | 3h |
| NACMK07 | DV373266   | D2S3 | 3h |
| NACMM30 | DV373578   | D2S3 | 3h |
| NACMN83 | DV373838   | D2S3 | 3h |
| NACMO33 | AAEL002512 | D2S3 | 3h |
| NACMP24 | AAEL009059 | D2S3 | 3h |
| NACMW32 | AAEL011000 | D2S3 | 3h |
| NACMY47 | DV371644   | D2S3 | 3h |
| NACMZ81 | DV372159   | D2S3 | 3h |
| NACN280 | DV380050   | D2S3 | 3h |
| NACN337 | DV380135   | D2S3 | 3h |
| NACN463 | DV380324   | D2S3 | 3h |
| NACNF07 | AAEL008504 | D2S3 | 3h |
| NACNM57 | AAEL013613 | D2S3 | 3h |
| NADA965 | AAEL011780 | D2S3 | 3h |
| NADAC79 | DV382477   | D2S3 | 3h |
| NADAI49 | AAEL007240 | D2S3 | 3h |
| NADAI81 | AAEL002798 | D2S3 | 3h |
| NADAU20 | AAEL002881 | D2S3 | 3h |
| NADAX44 | AAEL010762 | D2S3 | 3h |
| NADB267 | AAEL003237 | D2S3 | 3h |
| NADB789 | DV394655   | D2S3 | 3h |



|         |            |      |    |
|---------|------------|------|----|
| NADB883 | AAEL011927 | D2S3 | 3h |
| NADB932 | AAEL005820 | D2S3 | 3h |
| NADBC39 | AAEL013874 | D2S3 | 3h |
| NADBF09 | AAEL008286 | D2S3 | 3h |
| NADBH48 | AAEL009364 | D2S3 | 3h |
| NADBI46 | AAEL001447 | D2S3 | 3h |
| NADBJ96 | AAEL014042 | D2S3 | 3h |
| NADBK44 | AAEL008507 | D2S3 | 3h |
| NADBM68 | DV391014   | D2S3 | 3h |
| NADBU38 | AAEL006806 | D2S3 | 3h |
| NADBW45 | AAEL007029 | D2S3 | 3h |
| NADC294 | AAEL007295 | D2S3 | 3h |
| NADC644 | DV384693   | D2S3 | 3h |
| NADC918 | DV385539   | D2S3 | 3h |
| NADCC85 | AAEL013203 | D2S3 | 3h |
| NADCU09 | AAEL006408 | D2S3 | 3h |
| NADCY19 | AAEL001906 | D2S3 | 3h |
| NADDC89 | AAEL000758 | D2S3 | 3h |
| NADDD61 | AAEL008216 | D2S3 | 3h |
| NADDF53 | AAEL014388 | D2S3 | 3h |
| NADDI49 | AAEL004515 | D2S3 | 3h |
| NADDJ21 | DV430519   | D2S3 | 3h |
| NADDK16 | AAEL012740 | D2S3 | 3h |
| NADDN77 | AAEL003397 | D2S3 | 3h |
| NADDR57 | AAEL003548 | D2S3 | 3h |
| NADDS01 | AAEL011305 | D2S3 | 3h |
| NADDT10 | AAEL004209 | D2S3 | 3h |
| NADDW84 | DV398958   | D2S3 | 3h |
| NADDW93 | AAEL012943 | D2S3 | 3h |
| NADE018 | AAEL000262 | D2S3 | 3h |
| NADE131 | AAEL004938 | D2S3 | 3h |
| NADE386 | AAEL002844 | D2S3 | 3h |
| NADV184 | AAEL009324 | D2S3 | 3h |
| NADV471 | DV406570   | D2S3 | 3h |
| NADV501 | AAEL002175 | D2S3 | 3h |
| NADVO20 | AAEL006239 | D2S3 | 3h |
| NADVR04 | AAEL009937 | D2S3 | 3h |
| NADVS02 | DV399919   | D2S3 | 3h |
| NADVS07 | AAEL015010 | D2S3 | 3h |
| NADVW55 | AAEL004319 | D2S3 | 3h |
| NADVX13 | AAEL001235 | D2S3 | 3h |
| NADVY44 | AAEL000335 | D2S3 | 3h |
| NADVZ87 | AAEL004049 | D2S3 | 3h |
| NADW070 | AAEL003531 | D2S3 | 3h |
| NADW335 | AAEL007898 | D2S3 | 3h |
| NADW483 | AAEL009399 | D2S3 | 3h |
| NADW554 | AAEL001700 | D2S3 | 3h |

|         |            |      |    |
|---------|------------|------|----|
| NADW665 | AAEL012607 | D2S3 | 3h |
| NADW990 | AAEL003962 | D2S3 | 3h |
| NADWA53 | AAEL006398 | D2S3 | 3h |
| NADWB15 | DV413709   | D2S3 | 3h |
| NADWD21 | AAEL001516 | D2S3 | 3h |
| NADWD67 | DV414242   | D2S3 | 3h |
| NADWD69 | AAEL002614 | D2S3 | 3h |
| NADWE45 | AAEL001110 | D2S3 | 3h |
| NADWK04 | DV410622   | D2S3 | 3h |
| NADWN78 | DV414290   | D2S3 | 3h |
| NADWO51 | AAEL011639 | D2S3 | 3h |
| NADWO75 | AAEL009129 | D2S3 | 3h |
| NADWS82 | AAEL010937 | D2S3 | 3h |
| NADWT61 | DV410117   | D2S3 | 3h |
| NADWU29 | AAEL007893 | D2S3 | 3h |
| NADWV36 | DV410904   | D2S3 | 3h |
| NADWX27 | DV411758   | D2S3 | 3h |
| NADWX63 | AAEL001722 | D2S3 | 3h |
| NADWY10 | AAEL006161 | D2S3 | 3h |
| NADWY43 | AAEL014260 | D2S3 | 3h |
| NADX317 | DV406942   | D2S3 | 3h |
| NADX440 | AAEL012527 | D2S3 | 3h |
| NADX583 | AAEL002406 | D2S3 | 3h |
| NADX760 | AAEL013526 | D2S3 | 3h |
| NADX828 | DV408429   | D2S3 | 3h |
| NADX913 | AAEL004482 | D2S3 | 3h |
| NADXG16 | DV404545   | D2S3 | 3h |
| NADXI31 | AAEL001614 | D2S3 | 3h |
| NADXK91 | AAEL005613 | D2S3 | 3h |
| NADXS79 | DV428738   | D2S3 | 3h |
| NADXY36 | AAEL014958 | D2S3 | 3h |
| NADXZ63 | AAEL011851 | D2S3 | 3h |
| NADY013 | DV426794   | D2S3 | 3h |
| NADY282 | AAEL011516 | D2S3 | 3h |
| NADYB68 | DV421966   | D2S3 | 3h |
| NADYR48 | DV418423   | D2S3 | 3h |
| NADYW92 | AAEL003287 | D2S3 | 3h |
| NADZ264 | AAEL004744 | D2S3 | 3h |
| NADZG08 | AAEL015262 | D2S3 | 3h |
| NADZX48 | AAEL010185 | D2S3 | 3h |
| NAEA373 | DV437726   | D2S3 | 3h |
| NAAF052 | AAEL013260 | D2S3 | 3d |
| NAAF060 | DV277498   | D2S3 | 3d |
| NAAF122 | AAEL011103 | D2S3 | 3d |
| NAAF217 | DV278103   | D2S3 | 3d |
| NAAF310 | AAEL010847 | D2S3 | 3d |
| NAAF314 | AAEL004435 | D2S3 | 3d |

|         |            |      |    |
|---------|------------|------|----|
| NAAF402 | AAEL008587 | D2S3 | 3d |
| NAAF427 | AAEL006363 | D2S3 | 3d |
| NAAF529 | AAEL000193 | D2S3 | 3d |
| NAAF638 | DV279574   | D2S3 | 3d |
| NAAF703 | AAEL006061 | D2S3 | 3d |
| NAAF715 | AAEL007322 | D2S3 | 3d |
| NAAF719 | AAEL012287 | D2S3 | 3d |
| NAAFA91 | AAEL006279 | D2S3 | 3d |
| NAAFB09 | AAEL008379 | D2S3 | 3d |
| NAAFL12 | AAEL005884 | D2S3 | 3d |
| NAAFO21 | DV276175   | D2S3 | 3d |
| NAAFQ19 | AAEL008085 | D2S3 | 3d |
| NAAFS21 | AAEL001160 | D2S3 | 3d |
| NAAFT58 | AAEL008810 | D2S3 | 3d |
| NAAFW69 | DV272522   | D2S3 | 3d |
| NAAFY66 | AAEL009244 | D2S3 | 3d |
| NAAG321 | DV283653   | D2S3 | 3d |
| NAAG452 | AAEL003165 | D2S3 | 3d |
| NAAGA14 | DV284802   | D2S3 | 3d |
| NAAGV92 | AAEL007582 | D2S3 | 3d |
| NAAH353 | AAEL008641 | D2S3 | 3d |
| NAAH547 | DV274920   | D2S3 | 3d |
| NAAHF17 | DV276505   | D2S3 | 3d |
| NAAHG74 | AAEL011082 | D2S3 | 3d |
| NAAHI08 | AAEL012816 | D2S3 | 3d |
| NAAHN45 | AAEL002334 | D2S3 | 3d |
| NAAHS75 | DV287377   | D2S3 | 3d |
| NAAHZ40 | AAEL002397 | D2S3 | 3d |
| NAAI704 | DV286380   | D2S3 | 3d |
| NAAI753 | AAEL003939 | D2S3 | 3d |
| NAAI783 | AAEL001271 | D2S3 | 3d |
| NABM290 | AAEL002019 | D2S3 | 3d |
| NABM719 | AAEL008427 | D2S3 | 3d |
| NABM742 | DV298463   | D2S3 | 3d |
| NABM792 | DV298563   | D2S3 | 3d |
| NABMA27 | AAEL006146 | D2S3 | 3d |
| NABMB46 | AAEL001567 | D2S3 | 3d |
| NABMD26 | AAEL002530 | D2S3 | 3d |
| NABMR13 | AAEL007845 | D2S3 | 3d |
| NABMV71 | DV305971   | D2S3 | 3d |
| NABN083 | DV306958   | D2S3 | 3d |
| NABN383 | DV303875   | D2S3 | 3d |
| NABN454 | DV304241   | D2S3 | 3d |
| NABN488 | DV304331   | D2S3 | 3d |
| NABN636 | AAEL006589 | D2S3 | 3d |
| NABNP66 | AAEL007000 | D2S3 | 3d |
| NABO173 | AAEL002469 | D2S3 | 3d |

|         |            |      |    |
|---------|------------|------|----|
| NABOA70 | AAEL007973 | D2S3 | 3d |
| NABOB82 | AAEL000292 | D2S3 | 3d |
| NABOL05 | DV313856   | D2S3 | 3d |
| NABOL89 | AAEL006667 | D2S3 | 3d |
| NABOP03 | AAEL005676 | D2S3 | 3d |
| NABOQ04 | DV314858   | D2S3 | 3d |
| NABOX21 | AAEL014971 | D2S3 | 3d |
| NABP327 | AAEL013857 | D2S3 | 3d |
| NABP386 | AAEL003206 | D2S3 | 3d |
| NABP617 | AAEL009887 | D2S3 | 3d |
| NABP733 | AAEL008657 | D2S3 | 3d |
| NABP881 | AAEL006223 | D2S3 | 3d |
| NABPA33 | AAEL003275 | D2S3 | 3d |
| NABPA40 | AAEL003006 | D2S3 | 3d |
| NABPB74 | DV309409   | D2S3 | 3d |
| NABPG19 | AAEL010565 | D2S3 | 3d |
| NABPI87 | AAEL010211 | D2S3 | 3d |
| NABPT30 | AAEL014539 | D2S3 | 3d |
| NABPU76 | AAEL015533 | D2S3 | 3d |
| NABPV94 | AAEL006371 | D2S3 | 3d |
| NABPZ57 | AAEL002386 | D2S3 | 3d |
| NABPZ91 | AAEL011453 | D2S3 | 3d |
| NABQ552 | DV302524   | D2S3 | 3d |
| NABQ611 | AAEL002286 | D2S3 | 3d |
| NABQC31 | DV304379   | D2S3 | 3d |
| NABQE60 | DV319926   | D2S3 | 3d |
| NABRC29 | DV320449   | D2S3 | 3d |
| NABRV03 | AAEL001549 | D2S3 | 3d |
| NABRY21 | AAEL010198 | D2S3 | 3d |
| NABSV41 | AAEL003129 | D2S3 | 3d |
| NABTI63 | AAEL008476 | D2S3 | 3d |
| NABUW82 | AAEL001622 | D2S3 | 3d |
| NABW101 | DV347402   | D2S3 | 3d |
| NABW176 | AAEL007762 | D2S3 | 3d |
| NABW179 | DV347512   | D2S3 | 3d |
| NABW545 | DV348082   | D2S3 | 3d |
| NABW704 | AAEL014530 | D2S3 | 3d |
| NABW840 | AAEL010674 | D2S3 | 3d |
| NABWI18 | DV345676   | D2S3 | 3d |
| NABWJ11 | AAEL009882 | D2S3 | 3d |
| NABWK70 | DV345603   | D2S3 | 3d |
| NABWL42 | AAEL009105 | D2S3 | 3d |
| NABWQ08 | AAEL004042 | D2S3 | 3d |
| NABWR27 | AAEL005460 | D2S3 | 3d |
| NABWS44 | DV343801   | D2S3 | 3d |
| NABWS48 | AAEL002181 | D2S3 | 3d |
| NABWW55 | AAEL004462 | D2S3 | 3d |

|         |            |      |    |
|---------|------------|------|----|
| NABWW78 | AAEL006291 | D2S3 | 3d |
| NABWX06 | AAEL010520 | D2S3 | 3d |
| NABXC23 | DV353841   | D2S3 | 3d |
| NABY125 | AAEL005098 | D2S3 | 3d |
| NABY359 | AAEL010829 | D2S3 | 3d |
| NABY770 | AAEL010396 | D2S3 | 3d |
| NABZ758 | DV357860   | D2S3 | 3d |
| NACA016 | AAEL008732 | D2S3 | 3d |
| NACA369 | AAEL006836 | D2S3 | 3d |
| NACA446 | AAEL009283 | D2S3 | 3d |
| NACA864 | AAEL006957 | D2S3 | 3d |
| NACAF29 | AAEL012064 | D2S3 | 3d |
| NACAO45 | AAEL007536 | D2S3 | 3d |
| NACAR71 | AAEL011290 | D2S3 | 3d |
| NACAS57 | AAEL011362 | D2S3 | 3d |
| NACAW48 | AAEL004873 | D2S3 | 3d |
| NACB215 | AAEL009809 | D2S3 | 3d |
| NACB838 | DV365102   | D2S3 | 3d |
| NACB885 | AAEL008557 | D2S3 | 3d |
| NACBA92 | AAEL007820 | D2S3 | 3d |
| NACBD82 | DV366717   | D2S3 | 3d |
| NACBG41 | AAEL008110 | D2S3 | 3d |
| NACBO20 | AAEL013729 | D2S3 | 3d |
| NACBO80 | AAEL006364 | D2S3 | 3d |
| NACBP36 | AAEL003005 | D2S3 | 3d |
| NACBQ61 | AAEL009617 | D2S3 | 3d |
| NACBQ95 | AAEL003761 | D2S3 | 3d |
| NACBT30 | AAEL008328 | D2S3 | 3d |
| NACBU06 | AAEL011739 | D2S3 | 3d |
| NACM331 | AAEL011746 | D2S3 | 3d |
| NACMD30 | AAEL000942 | D2S3 | 3d |
| NACML76 | AAEL008714 | D2S3 | 3d |
| NACMN14 | AAEL011659 | D2S3 | 3d |
| NACMU89 | DV370685   | D2S3 | 3d |
| NACMW60 | AAEL005160 | D2S3 | 3d |
| NACN806 | DV380828   | D2S3 | 3d |
| NADA629 | AAEL000363 | D2S3 | 3d |
| NADA679 | DV389876   | D2S3 | 3d |
| NADA680 | AAEL011758 | D2S3 | 3d |
| NADAC03 | AAEL010025 | D2S3 | 3d |
| NADAF10 | AAEL009101 | D2S3 | 3d |
| NADAH26 | AAEL007830 | D2S3 | 3d |
| NADAK22 | DV385374   | D2S3 | 3d |
| NADAL91 | AAEL005629 | D2S3 | 3d |
| NADAS34 | AAEL000691 | D2S3 | 3d |
| NADAT49 | DV381834   | D2S3 | 3d |
| NADB135 | AAEL014625 | D2S3 | 3d |

|         |            |        |    |
|---------|------------|--------|----|
| NADB254 | DV393838   | D2S3   | 3d |
| NADBH39 | AAEL012438 | D2S3   | 3d |
| NADBM23 | DV390908   | D2S3   | 3d |
| NADBN83 | DV391188   | D2S3   | 3d |
| NADBT91 | AAEL004997 | D2S3   | 3d |
| NADC113 | AAEL010656 | D2S3   | 3d |
| NADC521 | DV384934   | D2S3   | 3d |
| NADC862 | AAEL008461 | D2S3   | 3d |
| NADCA90 | AAEL009968 | D2S3   | 3d |
| NADCF81 | AAEL008952 | D2S3   | 3d |
| NADCJ64 | AAEL000569 | D2S3   | 3d |
| NADCX11 | AAEL004107 | D2S3   | 3d |
| NADD251 | DV432384   | D2S3   | 3d |
| NADDA44 | AAEL008063 | D2S3   | 3d |
| NADDA63 | AAEL004412 | D2S3   | 3d |
| NADDB87 | AAEL005567 | D2S3   | 3d |
| NADDG86 | AAEL011830 | D2S3   | 3d |
| NADDH71 | AAEL005934 | D2S3   | 3d |
| NADDJ70 | DV431989   | D2S3   | 3d |
| NADDL55 | AAEL011105 | D2S3   | 3d |
| NADDS75 | AAEL001126 | D2S3   | 3d |
| NADDU56 | AAEL004249 | D2S3   | 3d |
| NADDV29 | AAEL003428 | D2S3   | 3d |
| NADE580 | DV397361   | D2S3   | 3d |
| NADE977 | AAEL007898 | D2S3   | 3d |
| NADEC06 | DV395396   | D2S3   | 3d |
| NADXJ43 | AAEL009074 | D2S3   | 3d |
| NADXL06 | AAEL007705 | D2S3   | 3d |
| NADXO19 | AAEL009391 | D2S3   | 3d |
| NADXT94 | AAEL004069 | D2S3   | 3d |
| NADXW02 | AAEL005162 | D2S3   | 3d |
| NADY075 | AAEL009757 | D2S3   | 3d |
| NADYC86 | AAEL013221 | D2S3   | 3d |
| NADYE13 | AAEL009185 | D2S3   | 3d |
| NADYG39 | DV419572   | D2S3   | 3d |
| NADYQ77 | AAEL000422 | D2S3   | 3d |
| NADYS15 | AAEL013827 | D2S3   | 3d |
| NADZD58 | DV418452   | D2S3   | 3d |
| NADZL01 | AAEL010892 | D2S3   | 3d |
| NAAF043 | AAEL002812 | Moyo-D | 3h |
| NAAF116 | DV277747   | Moyo-D | 3h |
| NAAF155 | AAEL005353 | Moyo-D | 3h |
| NAAF222 | AAEL010833 | Moyo-D | 3h |
| NAAF395 | AAEL015633 | Moyo-D | 3h |
| NAAF466 | DV279088   | Moyo-D | 3h |
| NAAF530 | AAEL015014 | Moyo-D | 3h |
| NAAF618 | AAEL007729 | Moyo-D | 3h |

|         |            |        |    |
|---------|------------|--------|----|
| NAAF704 | AAEL005619 | Moyo-D | 3h |
| NAAFD67 | AAEL011016 | Moyo-D | 3h |
| NAAFE36 | AAEL005355 | Moyo-D | 3h |
| NAAFG17 | DV273262   | Moyo-D | 3h |
| NAAFL21 | DV274949   | Moyo-D | 3h |
| NAAFO24 | AAEL011380 | Moyo-D | 3h |
| NAAFR76 | AAEL007149 | Moyo-D | 3h |
| NAAFS44 | AAEL002107 | Moyo-D | 3h |
| NAAFT68 | AAEL010422 | Moyo-D | 3h |
| NAAFV04 | AAEL008668 | Moyo-D | 3h |
| NAAFV44 | AAEL008486 | Moyo-D | 3h |
| NAAG077 | AAEL012874 | Moyo-D | 3h |
| NAAG239 | DV283494   | Moyo-D | 3h |
| NAAG418 | AAEL005968 | Moyo-D | 3h |
| NAAG486 | AAEL000470 | Moyo-D | 3h |
| NAAG930 | AAEL000173 | Moyo-D | 3h |
| NAAGI48 | AAEL011250 | Moyo-D | 3h |
| NAAGI67 | AAEL002554 | Moyo-D | 3h |
| NAAGJ74 | AAEL008430 | Moyo-D | 3h |
| NAAGK27 | DV280088   | Moyo-D | 3h |
| NAAGP27 | AAEL009613 | Moyo-D | 3h |
| NAAGQ10 | AAEL004406 | Moyo-D | 3h |
| NAAGS33 | AAEL000016 | Moyo-D | 3h |
| NAAGT83 | AAEL007592 | Moyo-D | 3h |
| NAAGU52 | AAEL013734 | Moyo-D | 3h |
| NAAGV27 | AAEL006340 | Moyo-D | 3h |
| NAAGW27 | AAEL012301 | Moyo-D | 3h |
| NAAGW30 | AAEL009819 | Moyo-D | 3h |
| NAAH492 | AAEL003143 | Moyo-D | 3h |
| NAAHL85 | AAEL007913 | Moyo-D | 3h |
| NAAHN61 | DV289787   | Moyo-D | 3h |
| NAAHN69 | DV289839   | Moyo-D | 3h |
| NAAHP85 | AAEL003043 | Moyo-D | 3h |
| NAAHR26 | DV287209   | Moyo-D | 3h |
| NAAHS92 | DV287485   | Moyo-D | 3h |
| NAAHW19 | DV287983   | Moyo-D | 3h |
| NAAI014 | DV288449   | Moyo-D | 3h |
| NAAI122 | AAEL001252 | Moyo-D | 3h |
| NAAI583 | AAEL008590 | Moyo-D | 3h |
| NAAI837 | AAEL014301 | Moyo-D | 3h |
| NAAIC78 | AAEL004378 | Moyo-D | 3h |
| NAAIE80 | AAEL008848 | Moyo-D | 3h |
| NABM094 | DV296421   | Moyo-D | 3h |
| NABM575 | DV297586   | Moyo-D | 3h |
| NABM873 | AAEL013999 | Moyo-D | 3h |
| NABMB07 | AAEL014733 | Moyo-D | 3h |
| NABMC70 | DV292322   | Moyo-D | 3h |

|         |            |        |    |
|---------|------------|--------|----|
| NABMC85 | DV292371   | Moyo-D | 3h |
| NABMF29 | DV293423   | Moyo-D | 3h |
| NABMG46 | DV293752   | Moyo-D | 3h |
| NABML07 | AAEL013178 | Moyo-D | 3h |
| NABMN36 | DV290556   | Moyo-D | 3h |
| NABMR75 | AAEL000064 | Moyo-D | 3h |
| NABMY10 | DV306426   | Moyo-D | 3h |
| NABN004 | AAEL007691 | Moyo-D | 3h |
| NABN424 | AAEL009498 | Moyo-D | 3h |
| NABN785 | DV305241   | Moyo-D | 3h |
| NABN982 | AAEL002291 | Moyo-D | 3h |
| NABNA40 | AAEL013147 | Moyo-D | 3h |
| NABNB14 | DV300570   | Moyo-D | 3h |
| NABNG73 | DV302789   | Moyo-D | 3h |
| NABNJ58 | AAEL007673 | Moyo-D | 3h |
| NABNN67 | AAEL007322 | Moyo-D | 3h |
| NABNT92 | AAEL008519 | Moyo-D | 3h |
| NABNU44 | DV295934   | Moyo-D | 3h |
| NABNV46 | DV296456   | Moyo-D | 3h |
| NABO033 | DV318806   | Moyo-D | 3h |
| NABO440 | AAEL003524 | Moyo-D | 3h |
| NABO618 | DV316791   | Moyo-D | 3h |
| NABO969 | DV317565   | Moyo-D | 3h |
| NABOJ11 | AAEL004793 | Moyo-D | 3h |
| NABOO95 | AAEL001421 | Moyo-D | 3h |
| NABOV37 | AAEL004311 | Moyo-D | 3h |
| NABOX94 | AAEL001804 | Moyo-D | 3h |
| NABOZ75 | AAEL009593 | Moyo-D | 3h |
| NABP061 | AAEL008068 | Moyo-D | 3h |
| NABP123 | AAEL004574 | Moyo-D | 3h |
| NABP417 | AAEL007962 | Moyo-D | 3h |
| NABP519 | DV311523   | Moyo-D | 3h |
| NABP719 | AAEL001933 | Moyo-D | 3h |
| NABP725 | DV311823   | Moyo-D | 3h |
| NABP729 | AAEL000866 | Moyo-D | 3h |
| NABPA62 | AAEL007215 | Moyo-D | 3h |
| NABPB83 | DV309387   | Moyo-D | 3h |
| NABPD14 | AAEL006647 | Moyo-D | 3h |
| NABPE05 | AAEL010798 | Moyo-D | 3h |
| NABPH06 | AAEL009563 | Moyo-D | 3h |
| NABPH78 | AAEL011751 | Moyo-D | 3h |
| NABPK34 | AAEL012161 | Moyo-D | 3h |
| NABPK82 | DV307589   | Moyo-D | 3h |
| NABPL72 | AAEL013285 | Moyo-D | 3h |
| NABPP03 | AAEL014493 | Moyo-D | 3h |
| NABPP16 | AAEL013025 | Moyo-D | 3h |
| NABPQ03 | AAEL011817 | Moyo-D | 3h |



|         |            |        |    |
|---------|------------|--------|----|
| NABPQ90 | DV308567   | Moyo-D | 3h |
| NABPR07 | AAEL010509 | Moyo-D | 3h |
| NABPU79 | AAEL000273 | Moyo-D | 3h |
| NABPY37 | AAEL010109 | Moyo-D | 3h |
| NABPY92 | AAEL005418 | Moyo-D | 3h |
| NABPZ31 | AAEL002291 | Moyo-D | 3h |
| NABPZ85 | DV300889   | Moyo-D | 3h |
| NABQ046 | DV301070   | Moyo-D | 3h |
| NABQ221 | DV301585   | Moyo-D | 3h |
| NABQ228 | AAEL001334 | Moyo-D | 3h |
| NABQ421 | DV302055   | Moyo-D | 3h |
| NABQ449 | AAEL009683 | Moyo-D | 3h |
| NABQ453 | AAEL008835 | Moyo-D | 3h |
| NABQ610 | AAEL005028 | Moyo-D | 3h |
| NABQ642 | DV302758   | Moyo-D | 3h |
| NABQ789 | AAEL012143 | Moyo-D | 3h |
| NABQ802 | AAEL003372 | Moyo-D | 3h |
| NABQ958 | DV303595   | Moyo-D | 3h |
| NABQA27 | AAEL004249 | Moyo-D | 3h |
| NABQB52 | DV304170   | Moyo-D | 3h |
| NABQB60 | AAEL012847 | Moyo-D | 3h |
| NABQC24 | AAEL004563 | Moyo-D | 3h |
| NABQD71 | DV304671   | Moyo-D | 3h |
| NABQD72 | AAEL010187 | Moyo-D | 3h |
| NABQF37 | AAEL006467 | Moyo-D | 3h |
| NABR842 | AAEL001605 | Moyo-D | 3h |
| NABR856 | AAEL007728 | Moyo-D | 3h |
| NABRI47 | DV321955   | Moyo-D | 3h |
| NABRJ19 | DV322118   | Moyo-D | 3h |
| NABRR29 | DV323899   | Moyo-D | 3h |
| NABRS19 | AAEL005901 | Moyo-D | 3h |
| NABRS45 | AAEL002503 | Moyo-D | 3h |
| NABRT95 | AAEL011830 | Moyo-D | 3h |
| NABRW45 | DV325268   | Moyo-D | 3h |
| NABS060 | AAEL009294 | Moyo-D | 3h |
| NABS240 | AAEL011224 | Moyo-D | 3h |
| NABS645 | AAEL011399 | Moyo-D | 3h |
| NABS876 | DV322772   | Moyo-D | 3h |
| NABS886 | AAEL005027 | Moyo-D | 3h |
| NABSA42 | AAEL010586 | Moyo-D | 3h |
| NABSB38 | AAEL005386 | Moyo-D | 3h |
| NABSB72 | DV332799   | Moyo-D | 3h |
| NABSD10 | DV333047   | Moyo-D | 3h |
| NABSD14 | DV333031   | Moyo-D | 3h |
| NABSH02 | DV333689   | Moyo-D | 3h |
| NABSU33 | DV332379   | Moyo-D | 3h |
| NABT878 | AAEL008620 | Moyo-D | 3h |

|         |            |        |    |
|---------|------------|--------|----|
| NABT893 | DV327542   | Moyo-D | 3h |
| NABT916 | AAEL012262 | Moyo-D | 3h |
| NABTC72 | AAEL003068 | Moyo-D | 3h |
| NABU115 | DV343106   | Moyo-D | 3h |
| NABU720 | DV340498   | Moyo-D | 3h |
| NABUJ42 | DV339533   | Moyo-D | 3h |
| NABUU18 | AAEL014082 | Moyo-D | 3h |
| NABUU90 | DV338031   | Moyo-D | 3h |
| NABV884 | AAEL011017 | Moyo-D | 3h |
| NABW122 | AAEL007136 | Moyo-D | 3h |
| NABW642 | AAEL003751 | Moyo-D | 3h |
| NABW750 | AAEL007402 | Moyo-D | 3h |
| NABW813 | AAEL015458 | Moyo-D | 3h |
| NABW889 | AAEL011387 | Moyo-D | 3h |
| NABWA13 | DV343752   | Moyo-D | 3h |
| NABWA82 | DV343954   | Moyo-D | 3h |
| NABWC86 | DV344004   | Moyo-D | 3h |
| NABWE35 | AAEL000160 | Moyo-D | 3h |
| NABWG45 | DV345407   | Moyo-D | 3h |
| NABWH26 | AAEL008077 | Moyo-D | 3h |
| NABWH28 | DV345562   | Moyo-D | 3h |
| NABWI69 | AAEL008579 | Moyo-D | 3h |
| NABWJ95 | AAEL011161 | Moyo-D | 3h |
| NABWK22 | AAEL012297 | Moyo-D | 3h |
| NABWL16 | AAEL011174 | Moyo-D | 3h |
| NABX019 | AAEL006158 | Moyo-D | 3h |
| NABX095 | DV352971   | Moyo-D | 3h |
| NABX324 | DV353150   | Moyo-D | 3h |
| NABX402 | AAEL014330 | Moyo-D | 3h |
| NABX839 | AAEL007076 | Moyo-D | 3h |
| NABXD49 | AAEL004856 | Moyo-D | 3h |
| NABXG70 | AAEL014550 | Moyo-D | 3h |
| NABXG80 | AAEL006158 | Moyo-D | 3h |
| NABXK47 | AAEL010020 | Moyo-D | 3h |
| NABXP75 | DV349409   | Moyo-D | 3h |
| NABXQ32 | AAEL006736 | Moyo-D | 3h |
| NABXR17 | DV349748   | Moyo-D | 3h |
| NABXS11 | AAEL009957 | Moyo-D | 3h |
| NABXZ42 | AAEL011990 | Moyo-D | 3h |
| NABY134 | AAEL001308 | Moyo-D | 3h |
| NABY263 | AAEL011641 | Moyo-D | 3h |
| NABY304 | AAEL008279 | Moyo-D | 3h |
| NABY343 | AAEL012546 | Moyo-D | 3h |
| NABY349 | AAEL000551 | Moyo-D | 3h |
| NABY405 | DV354834   | Moyo-D | 3h |
| NABY490 | AAEL006833 | Moyo-D | 3h |
| NABY879 | AAEL010940 | Moyo-D | 3h |

|         |            |        |    |
|---------|------------|--------|----|
| NABYA41 | DV355842   | Moyo-D | 3h |
| NABYC44 | AAEL012737 | Moyo-D | 3h |
| NABYC60 | AAEL013009 | Moyo-D | 3h |
| NABYF17 | AAEL001540 | Moyo-D | 3h |
| NABYF93 | AAEL009216 | Moyo-D | 3h |
| NABZ375 | AAEL013863 | Moyo-D | 3h |
| NABZ780 | DV357897   | Moyo-D | 3h |
| NABZ958 | DV358170   | Moyo-D | 3h |
| NABZE90 | AAEL012888 | Moyo-D | 3h |
| NACA003 | AAEL009634 | Moyo-D | 3h |
| NACA394 | DV364330   | Moyo-D | 3h |
| NACA981 | AAEL009082 | Moyo-D | 3h |
| NACAA42 | AAEL000404 | Moyo-D | 3h |
| NACAC05 | DV360301   | Moyo-D | 3h |
| NACAC95 | AAEL005405 | Moyo-D | 3h |
| NACAD88 | AAEL003158 | Moyo-D | 3h |
| NACAF94 | AAEL009492 | Moyo-D | 3h |
| NACAG96 | AAEL003950 | Moyo-D | 3h |
| NACAI43 | AAEL000090 | Moyo-D | 3h |
| NACAJ11 | AAEL010846 | Moyo-D | 3h |
| NACAN47 | AAEL001851 | Moyo-D | 3h |
| NACAO37 | AAEL008138 | Moyo-D | 3h |
| NACAO49 | AAEL007481 | Moyo-D | 3h |
| NACAO54 | AAEL008188 | Moyo-D | 3h |
| NACAR32 | DV363639   | Moyo-D | 3h |
| NACAS50 | AAEL006630 | Moyo-D | 3h |
| NACAT55 | AAEL006712 | Moyo-D | 3h |
| NACAW80 | AAEL004311 | Moyo-D | 3h |
| NACAY43 | AAEL008807 | Moyo-D | 3h |
| NACAY73 | AAEL001516 | Moyo-D | 3h |
| NACAZ10 | AAEL014321 | Moyo-D | 3h |
| NACB120 | AAEL003508 | Moyo-D | 3h |
| NACB232 | AAEL000010 | Moyo-D | 3h |
| NACB279 | AAEL001154 | Moyo-D | 3h |
| NACB341 | AAEL007038 | Moyo-D | 3h |
| NACB454 | AAEL002716 | Moyo-D | 3h |
| NACB782 | AAEL013975 | Moyo-D | 3h |
| NACB817 | AAEL008592 | Moyo-D | 3h |
| NACBA17 | AAEL010411 | Moyo-D | 3h |
| NACBB56 | #N/A       | Moyo-D | 3h |
| NACBB70 | AAEL004504 | Moyo-D | 3h |
| NACBB79 | AAEL012187 | Moyo-D | 3h |
| NACBF88 | AAEL006085 | Moyo-D | 3h |
| NACBG31 | AAEL013950 | Moyo-D | 3h |
| NACBI60 | AAEL014012 | Moyo-D | 3h |
| NACBL91 | DV368002   | Moyo-D | 3h |
| NACBM08 | AAEL012864 | Moyo-D | 3h |

|         |            |        |    |
|---------|------------|--------|----|
| NACBO25 | DV368467   | Moyo-D | 3h |
| NACBQ80 | AAEL001112 | Moyo-D | 3h |
| NACBQ89 | DV368881   | Moyo-D | 3h |
| NACBT40 | AAEL004586 | Moyo-D | 3h |
| NACBT91 | AAEL007084 | Moyo-D | 3h |
| NACBV18 | AAEL002761 | Moyo-D | 3h |
| NACM149 | DV374880   | Moyo-D | 3h |
| NACM460 | DV375386   | Moyo-D | 3h |
| NACM487 | AAEL010326 | Moyo-D | 3h |
| NACM945 | AAEL009110 | Moyo-D | 3h |
| NACMJ27 | AAEL011742 | Moyo-D | 3h |
| NACMK45 | AAEL000396 | Moyo-D | 3h |
| NACMR02 | DV374354   | Moyo-D | 3h |
| NACMW80 | AAEL006661 | Moyo-D | 3h |
| NACN226 | AAEL010906 | Moyo-D | 3h |
| NACNB91 | AAEL009646 | Moyo-D | 3h |
| NACNG16 | DV377540   | Moyo-D | 3h |
| NACNJ41 | AAEL010366 | Moyo-D | 3h |
| NACNL47 | AAEL010877 | Moyo-D | 3h |
| NACNM30 | AAEL003331 | Moyo-D | 3h |
| NACNN29 | #N/A       | Moyo-D | 3h |
| NACNQ06 | AAEL006858 | Moyo-D | 3h |
| NACNR67 | DV379305   | Moyo-D | 3h |
| NACNU50 | AAEL005261 | Moyo-D | 3h |
| NADA287 | AAEL005112 | Moyo-D | 3h |
| NADA459 | AAEL007642 | Moyo-D | 3h |
| NADA682 | AAEL009221 | Moyo-D | 3h |
| NADAA40 | AAEL001887 | Moyo-D | 3h |
| NADAC70 | DV382429   | Moyo-D | 3h |
| NADAE29 | AAEL012686 | Moyo-D | 3h |
| NADAM61 | AAEL004694 | Moyo-D | 3h |
| NADAQ01 | AAEL010276 | Moyo-D | 3h |
| NADAT81 | AAEL011485 | Moyo-D | 3h |
| NADAV10 | AAEL011622 | Moyo-D | 3h |
| NADAV92 | AAEL008073 | Moyo-D | 3h |
| NADAY37 | AAEL009687 | Moyo-D | 3h |
| NADAZ45 | AAEL013578 | Moyo-D | 3h |
| NADAZ95 | AAEL013472 | Moyo-D | 3h |
| NADB005 | AAEL009435 | Moyo-D | 3h |
| NADB182 | DV393778   | Moyo-D | 3h |
| NADB203 | AAEL001321 | Moyo-D | 3h |
| NADB255 | DV393840   | Moyo-D | 3h |
| NADB382 | DV394081   | Moyo-D | 3h |
| NADB554 | DV394610   | Moyo-D | 3h |
| NADB744 | DV394569   | Moyo-D | 3h |
| NADBE55 | DV392739   | Moyo-D | 3h |
| NADBJ91 | DV390434   | Moyo-D | 3h |

|         |            |        |    |
|---------|------------|--------|----|
| NADBK56 | DV390580   | Moyo-D | 3h |
| NADC183 | DV389643   | Moyo-D | 3h |
| NADC191 | AAEL014497 | Moyo-D | 3h |
| NADC474 | DV384250   | Moyo-D | 3h |
| NADC659 | DV385307   | Moyo-D | 3h |
| NADC891 | DV386168   | Moyo-D | 3h |
| NADC924 | AAEL015127 | Moyo-D | 3h |
| NADC933 | AAEL013133 | Moyo-D | 3h |
| NADCA53 | AAEL001698 | Moyo-D | 3h |
| NADCA85 | AAEL015199 | Moyo-D | 3h |
| NADCC48 | DV435783   | Moyo-D | 3h |
| NADCD32 | AAEL005567 | Moyo-D | 3h |
| NADCE32 | AAEL013402 | Moyo-D | 3h |
| NADCE53 | AAEL001129 | Moyo-D | 3h |
| NADCG48 | DV436492   | Moyo-D | 3h |
| NADCH69 | AAEL011233 | Moyo-D | 3h |
| NADCH84 | AAEL006246 | Moyo-D | 3h |
| NADCI02 | AAEL008389 | Moyo-D | 3h |
| NADCM24 | AAEL000515 | Moyo-D | 3h |
| NADCO22 | AAEL008663 | Moyo-D | 3h |
| NADCR41 | AAEL004112 | Moyo-D | 3h |
| NADCR63 | DV434921   | Moyo-D | 3h |
| NADCU87 | AAEL000828 | Moyo-D | 3h |
| NADD388 | DV432638   | Moyo-D | 3h |
| NADD591 | AAEL009430 | Moyo-D | 3h |
| NADD620 | AAEL010299 | Moyo-D | 3h |
| NADD762 | AAEL012163 | Moyo-D | 3h |
| NADD777 | AAEL015631 | Moyo-D | 3h |
| NADD787 | DV433219   | Moyo-D | 3h |
| NADD816 | AAEL015039 | Moyo-D | 3h |
| NADDB26 | AAEL000674 | Moyo-D | 3h |
| NADDE14 | AAEL009811 | Moyo-D | 3h |
| NADDE33 | AAEL006389 | Moyo-D | 3h |
| NADDG77 | AAEL011656 | Moyo-D | 3h |
| NADDH56 | DV431616   | Moyo-D | 3h |
| NADDJ85 | AAEL000672 | Moyo-D | 3h |
| NADDK11 | DV432067   | Moyo-D | 3h |
| NADDO65 | DV429564   | Moyo-D | 3h |
| NADDR05 | AAEL010051 | Moyo-D | 3h |
| NADDS61 | AAEL013796 | Moyo-D | 3h |
| NADDS62 | AAEL008865 | Moyo-D | 3h |
| NADDU41 | AAEL008435 | Moyo-D | 3h |
| NADDY15 | DV428880   | Moyo-D | 3h |
| NADDY82 | AAEL008562 | Moyo-D | 3h |
| NADDZ87 | DV396337   | Moyo-D | 3h |
| NADE010 | AAEL001017 | Moyo-D | 3h |
| NADE179 | AAEL013697 | Moyo-D | 3h |

|         |            |        |    |
|---------|------------|--------|----|
| NADE291 | AAEL008324 | Moyo-D | 3h |
| NADE515 | AAEL005715 | Moyo-D | 3h |
| NADE742 | AAEL004990 | Moyo-D | 3h |
| NADE829 | AAEL002550 | Moyo-D | 3h |
| NADE866 | DV397663   | Moyo-D | 3h |
| NADE914 | AAEL000472 | Moyo-D | 3h |
| NADEB10 | AAEL010247 | Moyo-D | 3h |
| NADEB19 | AAEL007777 | Moyo-D | 3h |
| NADED85 | AAEL004433 | Moyo-D | 3h |
| NADVG75 | AAEL001411 | Moyo-D | 3h |
| NADVN50 | AAEL006469 | Moyo-D | 3h |
| NADVP21 | AAEL011871 | Moyo-D | 3h |
| NADW380 | DV401801   | Moyo-D | 3h |
| NADW651 | AAEL012856 | Moyo-D | 3h |
| NADWD08 | DV415867   | Moyo-D | 3h |
| NADWS45 | AAEL007535 | Moyo-D | 3h |
| NADWT58 | AAEL011870 | Moyo-D | 3h |
| NADWU59 | DV407839   | Moyo-D | 3h |
| NADWW30 | DV408500   | Moyo-D | 3h |
| NADXB12 | DV428072   | Moyo-D | 3h |
| NADXB44 | DV428148   | Moyo-D | 3h |
| NADXB57 | AAEL005635 | Moyo-D | 3h |
| NADXE29 | DV428673   | Moyo-D | 3h |
| NADXG51 | DV404717   | Moyo-D | 3h |
| NADXH18 | AAEL002488 | Moyo-D | 3h |
| NADXI47 | AAEL014054 | Moyo-D | 3h |
| NADXJ71 | AAEL014695 | Moyo-D | 3h |
| NADXO80 | DV424207   | Moyo-D | 3h |
| NADXQ12 | DV424447   | Moyo-D | 3h |
| NADXR10 | AAEL007900 | Moyo-D | 3h |
| NADXT74 | AAEL001223 | Moyo-D | 3h |
| NADXW72 | DV426223   | Moyo-D | 3h |
| NADY463 | AAEL012397 | Moyo-D | 3h |
| NADY552 | AAEL002496 | Moyo-D | 3h |
| NADY883 | AAEL011072 | Moyo-D | 3h |
| NADY965 | AAEL012184 | Moyo-D | 3h |
| NADYE47 | AAEL001547 | Moyo-D | 3h |
| NADYE59 | AAEL003586 | Moyo-D | 3h |
| NADYH07 | DV422877   | Moyo-D | 3h |
| NADYM75 | AAEL003270 | Moyo-D | 3h |
| NADZK17 | DV411085   | Moyo-D | 3h |
| NADZO48 | DV411471   | Moyo-D | 3h |
| NADZT51 | DV412219   | Moyo-D | 3h |
| NADZW89 | AAEL005938 | Moyo-D | 3h |
| NADZY28 | DV412802   | Moyo-D | 3h |
| NAEA288 | DV437581   | Moyo-D | 3h |
| NAAF550 | AAEL004716 | Moyo-D | 3d |

|         |            |        |    |
|---------|------------|--------|----|
| NAAF17  | DV271726   | Moyo-D | 3d |
| NAAFQ80 | AAEL006406 | Moyo-D | 3d |
| NAAFS49 | DV271096   | Moyo-D | 3d |
| NAAFV20 | AAEL003632 | Moyo-D | 3d |
| NAAFV47 | AAEL003873 | Moyo-D | 3d |
| NAAG165 | AAEL001412 | Moyo-D | 3d |
| NAAG242 | DV283507   | Moyo-D | 3d |
| NAAG415 | AAEL007010 | Moyo-D | 3d |
| NAAG690 | DV284300   | Moyo-D | 3d |
| NAAGA24 | AAEL009572 | Moyo-D | 3d |
| NAAGO54 | AAEL001056 | Moyo-D | 3d |
| NAAGQ26 | AAEL010308 | Moyo-D | 3d |
| NAAH226 | DV279861   | Moyo-D | 3d |
| NAAH534 | AAEL008892 | Moyo-D | 3d |
| NAAHC86 | DV275893   | Moyo-D | 3d |
| NAAHF01 | AAEL000206 | Moyo-D | 3d |
| NAAHM10 | DV289565   | Moyo-D | 3d |
| NAAHM37 | DV289544   | Moyo-D | 3d |
| NAAHM86 | AAEL011306 | Moyo-D | 3d |
| NAAHN05 | AAEL015151 | Moyo-D | 3d |
| NAAHN72 | AAEL002811 | Moyo-D | 3d |
| NAAHQ16 | DV290208   | Moyo-D | 3d |
| NAAI464 | AAEL005742 | Moyo-D | 3d |
| NABMD71 | DV292706   | Moyo-D | 3d |
| NABMO36 | DV291039   | Moyo-D | 3d |
| NABMP23 | DV291411   | Moyo-D | 3d |
| NABMZ69 | AAEL010576 | Moyo-D | 3d |
| NABN138 | AAEL001857 | Moyo-D | 3d |
| NABN202 | AAEL013786 | Moyo-D | 3d |
| NABNK91 | DV298207   | Moyo-D | 3d |
| NABNP31 | AAEL004025 | Moyo-D | 3d |
| NABNS64 | AAEL015330 | Moyo-D | 3d |
| NABNS81 | AAEL001356 | Moyo-D | 3d |
| NABO838 | DV317188   | Moyo-D | 3d |
| NABOE67 | AAEL013012 | Moyo-D | 3d |
| NABOU12 | AAEL002925 | Moyo-D | 3d |
| NABOZ57 | DV313463   | Moyo-D | 3d |
| NABP240 | DV310976   | Moyo-D | 3d |
| NABPB20 | DV309314   | Moyo-D | 3d |
| NABPB91 | AAEL010032 | Moyo-D | 3d |
| NABPE31 | AAEL006656 | Moyo-D | 3d |
| NABPG08 | AAEL002163 | Moyo-D | 3d |
| NABPK07 | AAEL008804 | Moyo-D | 3d |
| NABQ608 | AAEL011475 | Moyo-D | 3d |
| NABQ689 | DV302915   | Moyo-D | 3d |
| NABR451 | AAEL010165 | Moyo-D | 3d |
| NABR605 | AAEL014729 | Moyo-D | 3d |

|         |            |        |    |
|---------|------------|--------|----|
| NABRM56 | DV322892   | Moyo-D | 3d |
| NABRT63 | AAEL004371 | Moyo-D | 3d |
| NABRT91 | AAEL010469 | Moyo-D | 3d |
| NABRU10 | AAEL006640 | Moyo-D | 3d |
| NABRU54 | AAEL006946 | Moyo-D | 3d |
| NABRV12 | DV324841   | Moyo-D | 3d |
| NABRV63 | DV324935   | Moyo-D | 3d |
| NABRW22 | AAEL013210 | Moyo-D | 3d |
| NABRW48 | DV325235   | Moyo-D | 3d |
| NABRY09 | AAEL006316 | Moyo-D | 3d |
| NABRY24 | AAEL000565 | Moyo-D | 3d |
| NABRY76 | DV325870   | Moyo-D | 3d |
| NABS014 | AAEL004972 | Moyo-D | 3d |
| NABS371 | AAEL010234 | Moyo-D | 3d |
| NABS410 | AAEL010347 | Moyo-D | 3d |
| NABS896 | DV322845   | Moyo-D | 3d |
| NABSA92 | DV332689   | Moyo-D | 3d |
| NABSB09 | DV332735   | Moyo-D | 3d |
| NABSC15 | DV332905   | Moyo-D | 3d |
| NABSV68 | AAEL005921 | Moyo-D | 3d |
| NABSZ13 | AAEL005160 | Moyo-D | 3d |
| NABTA60 | DV327913   | Moyo-D | 3d |
| NABTJ92 | AAEL002444 | Moyo-D | 3d |
| NABTK05 | AAEL004791 | Moyo-D | 3d |
| NABTQ37 | DV326289   | Moyo-D | 3d |
| NABTQ80 | DV326692   | Moyo-D | 3d |
| NABU849 | AAEL010933 | Moyo-D | 3d |
| NABUB85 | DV341042   | Moyo-D | 3d |
| NABUG84 | DV339129   | Moyo-D | 3d |
| NABUW64 | AAEL009487 | Moyo-D | 3d |
| NABUZ76 | DV335379   | Moyo-D | 3d |
| NABV806 | DV336636   | Moyo-D | 3d |
| NABVF13 | AAEL009173 | Moyo-D | 3d |
| NABW029 | AAEL006477 | Moyo-D | 3d |
| NABW541 | AAEL005364 | Moyo-D | 3d |
| NABWD62 | AAEL006340 | Moyo-D | 3d |
| NABWN31 | AAEL014365 | Moyo-D | 3d |
| NABWS05 | DV346571   | Moyo-D | 3d |
| NABWU93 | DV346988   | Moyo-D | 3d |
| NABWX34 | DV343369   | Moyo-D | 3d |
| NABX288 | AAEL000664 | Moyo-D | 3d |
| NABX405 | AAEL001397 | Moyo-D | 3d |
| NABX413 | DV353223   | Moyo-D | 3d |
| NABX788 | AAEL000237 | Moyo-D | 3d |
| NABXC60 | DV352178   | Moyo-D | 3d |
| NABXI03 | DV352595   | Moyo-D | 3d |
| NABXO41 | AAEL012435 | Moyo-D | 3d |



|         |            |        |    |
|---------|------------|--------|----|
| NABXV52 | DV350461   | Moyo-D | 3d |
| NABY450 | AAEL011159 | Moyo-D | 3d |
| NABY475 | AAEL004035 | Moyo-D | 3d |
| NABY571 | AAEL013877 | Moyo-D | 3d |
| NABY882 | AAEL003845 | Moyo-D | 3d |
| NABY910 | AAEL003403 | Moyo-D | 3d |
| NABY986 | AAEL001888 | Moyo-D | 3d |
| NABYC70 | AAEL006610 | Moyo-D | 3d |
| NABZ427 | AAEL005873 | Moyo-D | 3d |
| NABZA05 | AAEL008467 | Moyo-D | 3d |
| NACA059 | AAEL003909 | Moyo-D | 3d |
| NACA232 | DV364104   | Moyo-D | 3d |
| NACA257 | DV364158   | Moyo-D | 3d |
| NACA557 | AAEL006010 | Moyo-D | 3d |
| NACA639 | AAEL007446 | Moyo-D | 3d |
| NACA735 | DV364871   | Moyo-D | 3d |
| NACA860 | AAEL007461 | Moyo-D | 3d |
| NACAE73 | AAEL014559 | Moyo-D | 3d |
| NACAH11 | DV361925   | Moyo-D | 3d |
| NACAJ86 | AAEL010821 | Moyo-D | 3d |
| NACAL70 | AAEL006776 | Moyo-D | 3d |
| NACAT57 | DV359875   | Moyo-D | 3d |
| NACAU46 | AAEL003957 | Moyo-D | 3d |
| NACAV29 | AAEL009393 | Moyo-D | 3d |
| NACB116 | AAEL011727 | Moyo-D | 3d |
| NACB988 | DV365517   | Moyo-D | 3d |
| NACBD58 | AAEL009449 | Moyo-D | 3d |
| NACBE57 | AAEL003184 | Moyo-D | 3d |
| NACBH12 | DV367273   | Moyo-D | 3d |
| NACBK22 | AAEL000388 | Moyo-D | 3d |
| NACBL80 | AAEL011014 | Moyo-D | 3d |
| NACBM31 | AAEL013921 | Moyo-D | 3d |
| NACM430 | AAEL003698 | Moyo-D | 3d |
| NACMF21 | AAEL009755 | Moyo-D | 3d |
| NADA155 | DV388149   | Moyo-D | 3d |
| NADA706 | AAEL011273 | Moyo-D | 3d |
| NADAH10 | DV384124   | Moyo-D | 3d |
| NADAJ19 | AAEL008228 | Moyo-D | 3d |
| NADAK12 | AAEL010461 | Moyo-D | 3d |
| NADAL80 | AAEL007771 | Moyo-D | 3d |
| NADB194 | AAEL010332 | Moyo-D | 3d |
| NADB481 | AAEL001166 | Moyo-D | 3d |
| NADBA43 | AAEL008677 | Moyo-D | 3d |
| NADBG59 | AAEL002435 | Moyo-D | 3d |
| NADBL57 | AAEL007078 | Moyo-D | 3d |
| NADBN52 | DV391158   | Moyo-D | 3d |
| NADBS39 | DV391594   | Moyo-D | 3d |

|         |            |        |    |
|---------|------------|--------|----|
| NADBV57 | DV387618   | Moyo-D | 3d |
| NADC279 | DV389881   | Moyo-D | 3d |
| NADC788 | AAEL007839 | Moyo-D | 3d |
| NADC929 | AAEL011734 | Moyo-D | 3d |
| NADCB61 | DV386143   | Moyo-D | 3d |
| NADCP95 | AAEL006952 | Moyo-D | 3d |
| NADCT36 | AAEL009367 | Moyo-D | 3d |
| NADCX10 | AAEL006573 | Moyo-D | 3d |
| NADD159 | AAEL007034 | Moyo-D | 3d |
| NADD459 | DV432743   | Moyo-D | 3d |
| NADDD50 | DV431001   | Moyo-D | 3d |
| NADDL05 | AAEL004828 | Moyo-D | 3d |
| NADDL18 | DV432209   | Moyo-D | 3d |
| NADDU28 | AAEL006745 | Moyo-D | 3d |
| NADDU71 | AAEL011894 | Moyo-D | 3d |
| NADE576 | AAEL003261 | Moyo-D | 3d |
| NADE946 | AAEL012745 | Moyo-D | 3d |
| NADEE26 | DV395730   | Moyo-D | 3d |
| NADEE37 | AAEL005666 | Moyo-D | 3d |
| NADV020 | AAEL006696 | Moyo-D | 3d |
| NADV128 | AAEL006235 | Moyo-D | 3d |
| NADV178 | DV405958   | Moyo-D | 3d |
| NADV185 | DV405966   | Moyo-D | 3d |
| NADV346 | DV406430   | Moyo-D | 3d |
| NADV374 | AAEL008503 | Moyo-D | 3d |
| NADV406 | AAEL008525 | Moyo-D | 3d |
| NADV412 | AAEL012081 | Moyo-D | 3d |
| NADV622 | DV407220   | Moyo-D | 3d |
| NADV907 | DV399126   | Moyo-D | 3d |
| NADV949 | AAEL012354 | Moyo-D | 3d |
| NADVB05 | AAEL009457 | Moyo-D | 3d |
| NADVD33 | DV400424   | Moyo-D | 3d |
| NADVD54 | DV401113   | Moyo-D | 3d |
| NADVG96 | DV402261   | Moyo-D | 3d |
| NADVH92 | AAEL002874 | Moyo-D | 3d |
| NADVI22 | DV402017   | Moyo-D | 3d |
| NADVJ47 | DV403107   | Moyo-D | 3d |
| NADVJ55 | AAEL004196 | Moyo-D | 3d |
| NADVJ73 | AAEL012177 | Moyo-D | 3d |
| NADVL28 | AAEL014147 | Moyo-D | 3d |
| NADVM11 | AAEL008876 | Moyo-D | 3d |
| NADVN05 | AAEL014739 | Moyo-D | 3d |
| NADVO02 | DV404708   | Moyo-D | 3d |
| NADVO32 | AAEL006803 | Moyo-D | 3d |
| NADVP18 | DV403804   | Moyo-D | 3d |
| NADVP54 | AAEL000411 | Moyo-D | 3d |
| NADVQ60 | AAEL012117 | Moyo-D | 3d |

|         |            |        |    |
|---------|------------|--------|----|
| NADVR06 | AAEL003762 | Moyo-D | 3d |
| NADV09  | AAEL013561 | Moyo-D | 3d |
| NADW321 | DV401706   | Moyo-D | 3d |
| NADW326 | AAEL006542 | Moyo-D | 3d |
| NADW623 | DV414779   | Moyo-D | 3d |
| NADWA08 | AAEL000763 | Moyo-D | 3d |
| NADWJ44 | DV413647   | Moyo-D | 3d |
| NADWL33 | DV411273   | Moyo-D | 3d |
| NADWL59 | DV411404   | Moyo-D | 3d |
| NADWM07 | DV411587   | Moyo-D | 3d |
| NADWM15 | DV411606   | Moyo-D | 3d |
| NADWO12 | AAEL009503 | Moyo-D | 3d |
| NADWQ57 | AAEL012180 | Moyo-D | 3d |
| NADWY77 | AAEL002254 | Moyo-D | 3d |
| NADX288 | AAEL007895 | Moyo-D | 3d |
| NADX584 | AAEL008723 | Moyo-D | 3d |
| NADX595 | AAEL006978 | Moyo-D | 3d |
| NADXB48 | AAEL007668 | Moyo-D | 3d |
| NADXC94 | AAEL003269 | Moyo-D | 3d |
| NADXE65 | DV425584   | Moyo-D | 3d |
| NADXG66 | DV404744   | Moyo-D | 3d |
| NADXJ30 | AAEL008849 | Moyo-D | 3d |
| NADXM69 | AAEL004838 | Moyo-D | 3d |
| NADXM78 | AAEL002809 | Moyo-D | 3d |
| NADXR09 | AAEL007509 | Moyo-D | 3d |
| NADXT26 | AAEL007251 | Moyo-D | 3d |
| NADXZ18 | DV423010   | Moyo-D | 3d |
| NADY346 | AAEL012019 | Moyo-D | 3d |
| NADY525 | AAEL008281 | Moyo-D | 3d |
| NADY540 | DV420883   | Moyo-D | 3d |
| NADY628 | DV424473   | Moyo-D | 3d |
| NADY683 | AAEL010178 | Moyo-D | 3d |
| NADY748 | DV424618   | Moyo-D | 3d |
| NADY971 | DV421615   | Moyo-D | 3d |
| NADYA46 | DV425114   | Moyo-D | 3d |
| NADYC60 | AAEL010317 | Moyo-D | 3d |
| NADYE72 | AAEL003858 | Moyo-D | 3d |
| NADYH67 | AAEL010523 | Moyo-D | 3d |
| NADYN54 | DV417749   | Moyo-D | 3d |
| NADYP40 | DV418103   | Moyo-D | 3d |
| NADYQ36 | DV418234   | Moyo-D | 3d |
| NADYT66 | AAEL011606 | Moyo-D | 3d |
| NADYV84 | AAEL001498 | Moyo-D | 3d |
| NADYW52 | AAEL003216 | Moyo-D | 3d |
| NADYZ94 | AAEL009026 | Moyo-D | 3d |
| NADZ185 | AAEL007114 | Moyo-D | 3d |
| NADZ304 | DV417164   | Moyo-D | 3d |

|         |            |        |    |
|---------|------------|--------|----|
| NADZ376 | DV419980   | Moyo-D | 3d |
| NADZ553 | DV420269   | Moyo-D | 3d |
| NADZ938 | DV417712   | Moyo-D | 3d |
| NADZA56 | AAEL011301 | Moyo-D | 3d |
| NADZC56 | DV418275   | Moyo-D | 3d |
| NADZE15 | DV418545   | Moyo-D | 3d |
| NADZE74 | AAEL009212 | Moyo-D | 3d |
| NADZF57 | AAEL002466 | Moyo-D | 3d |
| NADZF58 | DV410457   | Moyo-D | 3d |
| NADZF83 | AAEL002366 | Moyo-D | 3d |
| NADZG15 | DV410548   | Moyo-D | 3d |
| NADZG44 | AAEL001282 | Moyo-D | 3d |
| NADZH54 | DV410714   | Moyo-D | 3d |
| NADZH79 | AAEL005277 | Moyo-D | 3d |
| NADZN76 | AAEL001024 | Moyo-D | 3d |
| NADZO42 | AAEL000499 | Moyo-D | 3d |
| NADZP33 | AAEL004960 | Moyo-D | 3d |
| NADZP45 | DV417010   | Moyo-D | 3d |
| NADZQ74 | AAEL011739 | Moyo-D | 3d |
| NADZR59 | DV411951   | Moyo-D | 3d |
| NADZT91 | AAEL001056 | Moyo-D | 3d |
| NADZU76 | AAEL008650 | Moyo-D | 3d |
| NADZW45 | AAEL005690 | Moyo-D | 3d |
| NADZX04 | AAEL006697 | Moyo-D | 3d |
| NADZX29 | AAEL006109 | Moyo-D | 3d |
| NADZZ76 | AAEL003385 | Moyo-D | 3d |
| NAEA068 | AAEL010330 | Moyo-D | 3d |
| NAEA268 | DV437545   | Moyo-D | 3d |
| NAEA270 | AAEL014932 | Moyo-D | 3d |
| NAEA280 | AAEL002142 | Moyo-D | 3d |
| NAEA287 | AAEL001155 | Moyo-D | 3d |

### **Online Resource 3**

#### **cDNA ID      VectroBase/Gen Up-regulated in strain and time**

|         |            |                           |
|---------|------------|---------------------------|
| NAAG339 | AAEL004688 | D2S3 (3h) / D2S3 (3d)     |
| NABNS60 | AAEL007665 | D2S3 (3h) / D2S3 (3d)     |
| NABO015 | AAEL008882 | D2S3 (3h) / D2S3 (3d)     |
| NABOO31 | DV314545   | D2S3 (3h) / D2S3 (3d)     |
| NABSW88 | DV329578   | D2S3 (3h) / D2S3 (3d)     |
| NABW234 | DV347556   | D2S3 (3h) / D2S3 (3d)     |
| NADBI46 | AAEL001447 | D2S3 (3h) / D2S3 (3d)     |
| NADX583 | AAEL002406 | D2S3 (3h) / D2S3 (3d)     |
| NADXG16 | DV404545   | D2S3 (3h) / D2S3 (3d)     |
| NABPM17 | AAEL014931 | D2S3 (3h) / Moyo-D (3d)   |
| NABUF31 | DV338929   | D2S3 (3h) / Moyo-D (3d)   |
| NABV642 | AAEL009136 | D2S3 (3h) / Moyo-D (3d)   |
| NABXB63 | AAEL011282 | D2S3 (3h) / Moyo-D (3d)   |
| NACMM30 | DV373578   | D2S3 (3h) / Moyo-D (3d)   |
| NADV471 | DV406570   | D2S3 (3h) / Moyo-D (3d)   |
| NADVR04 | AAEL009937 | D2S3 (3h) / Moyo-D (3d)   |
| NADVS02 | DV399919   | D2S3 (3h) / Moyo-D (3d)   |
| NADW335 | AAEL007898 | D2S3 (3h) / Moyo-D (3d)   |
| NADYB68 | DV421966   | D2S3 (3h) / Moyo-D (3d)   |
| NAAF043 | AAEL002812 | Moyo-D (3h) / D2S3 (3d)   |
| NAAF155 | AAEL005353 | Moyo-D (3h) / D2S3 (3d)   |
| NAAF618 | AAEL007729 | Moyo-D (3h) / D2S3 (3d)   |
| NAAF704 | AAEL005619 | Moyo-D (3h) / D2S3 (3d)   |
| NAAFR76 | AAEL007149 | Moyo-D (3h) / D2S3 (3d)   |
| NAAHN61 | DV289787   | Moyo-D (3h) / D2S3 (3d)   |
| NAAI837 | AAEL014301 | Moyo-D (3h) / D2S3 (3d)   |
| NABN424 | AAEL009498 | Moyo-D (3h) / D2S3 (3d)   |
| NABPH78 | AAEL011751 | Moyo-D (3h) / D2S3 (3d)   |
| NABPK34 | AAEL012161 | Moyo-D (3h) / D2S3 (3d)   |
| NABPZ85 | DV300889   | Moyo-D (3h) / D2S3 (3d)   |
| NABQ221 | DV301585   | Moyo-D (3h) / D2S3 (3d)   |
| NABQD71 | DV304671   | Moyo-D (3h) / D2S3 (3d)   |
| NABS876 | DV322772   | Moyo-D (3h) / D2S3 (3d)   |
| NABZE90 | AAEL012888 | Moyo-D (3h) / D2S3 (3d)   |
| NACA394 | DV364330   | Moyo-D (3h) / D2S3 (3d)   |
| NACBQ89 | DV368881   | Moyo-D (3h) / D2S3 (3d)   |
| NADC183 | DV389643   | Moyo-D (3h) / D2S3 (3d)   |
| NADC933 | AAEL013133 | Moyo-D (3h) / D2S3 (3d)   |
| NADXB12 | DV428072   | Moyo-D (3h) / D2S3 (3d)   |
| NABQB60 | AAEL012847 | Moyo-D (3h) / Moyo-D (3d) |
| NABRR29 | DV323899   | Moyo-D (3h) / Moyo-D (3d) |
| NABRW45 | DV325268   | Moyo-D (3h) / Moyo-D (3d) |
| NABSU33 | DV332379   | Moyo-D (3h) / Moyo-D (3d) |
| NABTC72 | AAEL003068 | Moyo-D (3h) / Moyo-D (3d) |

|         |            |                           |
|---------|------------|---------------------------|
| NABWH28 | DV345562   | Moyo-D (3h) / Moyo-D (3d) |
| NABX839 | AAEL007076 | Moyo-D (3h) / Moyo-D (3d) |
| NACBQ80 | AAEL001112 | Moyo-D (3h) / Moyo-D (3d) |
| NADCE32 | AAEL013402 | Moyo-D (3h) / Moyo-D (3d) |
| NADD777 | AAEL015631 | Moyo-D (3h) / Moyo-D (3d) |
| NADDH56 | DV431616   | Moyo-D (3h) / Moyo-D (3d) |
| NADW380 | DV401801   | Moyo-D (3h) / Moyo-D (3d) |
| NADWT58 | AAEL011870 | Moyo-D (3h) / Moyo-D (3d) |
| NADXQ12 | DV424447   | Moyo-D (3h) / Moyo-D (3d) |
| NADYE59 | AAEL003586 | Moyo-D (3h) / Moyo-D (3d) |

#### **Online Resource 4**

| <b>S3h</b>    | No. of genes R3h | No. of genes S3d | No. of genes R3d | No. of genes |
|---------------|------------------|------------------|------------------|--------------|
| ATP binding   | 13               | 18               | 12               | 11           |
| binding       | 14               | 15               | 8                | 9            |
| catalytic ac  | 18               | 15               | 15               | 10           |
| integral to   | 9                | 16               | 8                | 14           |
| intracellular | 15               | 18               | 16               | 21           |
| membrane      | 14               | 25               | 10               | 8            |
| metabolic p   | 14               | 19               | 12               | 23           |
| nucleotide    | 17               | 17               | 10               | 9            |
| protein bin   | 37               | 23               | 27               | 25           |
| zinc ion bin  | 14               | 42               | 13               | 9            |

## Online Resource 5

| Gene       | Gene description (VectorBase)                                                                               | Pathway(s) annotation (KEGG)                                                                                                                                                                                   | Expression pattern                            |
|------------|-------------------------------------------------------------------------------------------------------------|----------------------------------------------------------------------------------------------------------------------------------------------------------------------------------------------------------------|-----------------------------------------------|
| AAEL003508 | serine-pyruvate aminotransferase                                                                            | Alanine, aspartate and glutamate metabolism, Glycine, serine and threonine metabolism, Peroxisome                                                                                                              | Upregulated in Moyo-D after 3hr of infection  |
| AAEL004042 | conserved hypothetical protein                                                                              | Amino sugar and nucleotide sugar metabolism                                                                                                                                                                    | Upregulated in D2S3 after 3day of infection   |
| AAEL006364 | conserved hypothetical protein                                                                              | Amino sugar and nucleotide sugar metabolism                                                                                                                                                                    | Upregulated in D2S3 after 3day of infection   |
| AAEL013877 | Glucosamine-6-phosphate isomerase (EC 3.5.99.6)(Glucosamine-6-phosphate deaminase)(GlcN6P deaminase)(GNPDA) | Amino sugar and nucleotide sugar metabolism                                                                                                                                                                    | Upregulated in Moyo-D after 3day of infection |
| AAEL007839 | beta-hexosaminidase                                                                                         | Amino sugar and nucleotide sugar metabolism, Glycosaminoglycan degradation, Glycosphingolipid biosynthesis - globo series, Glycosphingolipid biosynthesis - ganglio series, Other glycan degradation, Lysosome | Upregulated in Moyo-D after 3day of infection |
| AAEL000388 | isoleucyl tRNA synthetase                                                                                   | Aminoacyl-tRNA biosynthesis                                                                                                                                                                                    | Upregulated in Moyo-D after 3day of infection |
| AAEL007038 | prolyl 4-hydroxylase alpha subunit 1,                                                                       | Arginine and proline metabolism                                                                                                                                                                                | Upregulated in Moyo-D after 3hr of infection  |
| AAEL009185 | arginine or creatine kinase                                                                                 | Arginine and proline metabolism                                                                                                                                                                                | Upregulated in D2S3 after 3day of             |



|            |                                                                                          |                                                                                                                      |                                               |
|------------|------------------------------------------------------------------------------------------|----------------------------------------------------------------------------------------------------------------------|-----------------------------------------------|
|            |                                                                                          |                                                                                                                      | infection                                     |
| AAEL005742 | transcription initiation factor TFIID subunit 10, putative                               | Basal transcription factors                                                                                          | Upregulated in Moyo-D after 3day of infection |
| AAEL000404 | DNA repair helicase rad3/xp-d                                                            | Basal transcription factors, Nucleotide excision repair                                                              | Upregulated in Moyo-D after 3hr of infection  |
| AAEL011380 | high mobility group B1, putative                                                         | Base excision repair                                                                                                 | Upregulated in Moyo-D after 3hr of infection  |
| AAEL008216 | aconitase                                                                                | Citrate cycle (TCA cycle), Glyoxylate and dicarboxylate metabolism                                                   | Upregulated in D2S3 after 3hr of infection    |
| AAEL010330 | succinate dehydrogenase                                                                  | Citrate cycle (TCA cycle), Oxidative phosphorylation                                                                 | Upregulated in Moyo-D after 3day of infection |
| AAEL006833 | succinyl-CoA synthetase small subunit, putative                                          | Citrate cycle (TCA cycle), Propanoate metabolism                                                                     | Upregulated in Moyo-D after 3hr of infection  |
| AAEL011746 | succinyl-coa synthetase beta chain                                                       | Citrate cycle (TCA cycle), Propanoate metabolism                                                                     | Upregulated in D2S3 after 3day of infection   |
| AAEL011830 | Probable methylthioribulose-1-phosphate dehydratase (MTRu-1-P dehydratase)(EC 4.2.1.109) | Cysteine and methionine metabolism                                                                                   | Upregulated in Moyo-D after 3hr of infection  |
| AAEL001378 | spermine synthase                                                                        | Cysteine and methionine metabolism, Arginine and proline metabolism, beta-Alanine metabolism, Glutathione metabolism | Upregulated in D2S3 after 3hr of infection    |
| AAEL012546 | DNA replication licensing factor MCM6                                                    | DNA replication                                                                                                      | Upregulated in Moyo-D after 3hr of infection  |
| AAEL006223 | replication factor C, 37kD-subunit, putative                                             | DNA replication, Nucleotide excision repair, Mismatch repair                                                         | Upregulated in D2S3 after 3day of infection   |
| AAEL004688 | conserved hypothetical protein                                                           | Dorso-ventral axis formation                                                                                         | Upregulated in D2S3 after 3hr of infection    |

|            |                                           |                                                        |                                               |
|------------|-------------------------------------------|--------------------------------------------------------|-----------------------------------------------|
| AAEL005386 | collagen alpha chain, anopheles           | ECM-receptor interaction                               | Upregulated in Moyo-D after 3hr of infection  |
| AAEL013147 | hypothetical protein                      | ECM-receptor interaction                               | Upregulated in Moyo-D after 3hr of infection  |
| AAEL001698 | charged multivesicular body protein 4b    | Endocytosis                                            | Upregulated in Moyo-D after 3hr of infection  |
| AAEL002469 | endophilin a,                             | Endocytosis                                            | Upregulated in D2S3 after 3day of infection   |
| AAEL006776 | blastoderm specific protein 25D, putative | Endocytosis                                            | Upregulated in Moyo-D after 3day of infection |
| AAEL007288 | dynamamin                                 | Endocytosis                                            | Upregulated in D2S3 after 3hr of infection    |
| AAEL007509 | neuroendocrine differentiation factor     | Endocytosis                                            | Upregulated in Moyo-D after 3day of infection |
| AAEL008184 | conserved hypothetical protein            | Endocytosis                                            | Upregulated in D2S3 after 3hr of infection    |
| AAEL009754 | endophilin b                              | Endocytosis                                            | Upregulated in D2S3 after 3hr of infection    |
| AAEL007845 | rab5                                      | Endocytosis, Phagosome                                 | Upregulated in D2S3 after 3day of infection   |
| AAEL001235 | palmitoyl-protein thioesterase            | Fatty acid elongation, Lysosome                        | Upregulated in D2S3 after 3hr of infection    |
| AAEL007536 | carnitine o-acyltransferase               | Fatty acid metabolism                                  | Upregulated in D2S3 after 3day of infection   |
| AAEL006836 | dihydropteridine reductase                | Folate biosynthesis                                    | Upregulated in D2S3 after 3day of infection   |
| AAEL006316 | ketohexokinase                            | Fructose and mannose metabolism                        | Upregulated in Moyo-D after 3day of infection |
| AAEL014958 | galactokinase                             | Galactose metabolism, Amino sugar and nucleotide sugar | Upregulated in D2S3 after 3hr of infection    |

|            |                                    |                                                                                                                                                 |                                               |
|------------|------------------------------------|-------------------------------------------------------------------------------------------------------------------------------------------------|-----------------------------------------------|
|            |                                    | metabolism                                                                                                                                      |                                               |
| AAEL006239 | glycerol kinase                    | Glycerolipid metabolism                                                                                                                         | Upregulated in D2S3 after 3hr of infection    |
| AAEL007322 | phosphatidate phosphatase          | Glycerolipid metabolism, Glycerophospholipid metabolism, Ether lipid metabolism, Sphingolipid metabolism                                        | Upregulated in D2S3 after 3day of infection   |
| AAEL003873 | glycerol-3-phosphate dehydrogenase | Glycerophospholipid metabolism                                                                                                                  | Upregulated in Moyo-D after 3day of infection |
| AAEL006667 | phosphatidyltransferase            | Glycerophospholipid metabolism, Ether lipid metabolism                                                                                          | Upregulated in D2S3 after 3day of infection   |
| AAEL008467 | cysteine synthase                  | Glycine, serine and threonine metabolism, Cysteine and methionine metabolism                                                                    | Upregulated in Moyo-D after 3day of infection |
| AAEL013613 | pyruvate dehydrogenase             | Glycolysis / Gluconeogenesis, Citrate cycle (TCA cycle), Pyruvate metabolism, Butanoate metabolism, Valine, leucine and isoleucine biosynthesis | Upregulated in D2S3 after 3hr of infection    |
| AAEL015010 | acetyl-coa synthetase              | Glycolysis / Gluconeogenesis, Pyruvate metabolism, Propanoate metabolism                                                                        | Upregulated in D2S3 after 3hr of infection    |
| AAEL014913 | pyruvate kinase                    | Glycolysis / Gluconeogenesis, Pyruvate metabolism, Purine metabolism                                                                            | Upregulated in D2S3 after 3hr of infection    |

|            |                                                     |                                                                                                        |                                               |
|------------|-----------------------------------------------------|--------------------------------------------------------------------------------------------------------|-----------------------------------------------|
| AAEL007895 | beta-1,4-galactosyltransferase                      | Glycosaminoglycan biosynthesis - chondroitin sulfate, Glycosaminoglycan biosynthesis - heparan sulfate | Upregulated in Moyo-D after 3day of infection |
| AAEL005460 | alpha-galactosidase/alpha-n-acetylgalactosaminidase | Glycosphingolipid biosynthesis - globo series, Lysosome                                                | Upregulated in D2S3 after 3day of infection   |
| AAEL004351 | casein kinase                                       | Hedgehog signaling pathway                                                                             | Upregulated in D2S3 after 3hr of infection    |
| AAEL011993 | conserved hypothetical protein                      | Homologous recombination, Fanconi anemia pathway                                                       | Upregulated in D2S3 after 3hr of infection    |
| AAEL003143 | inositol polyphosphate 5-phosphatase                | Inositol phosphate metabolism, Phosphatidylinositol signaling system                                   | Upregulated in Moyo-D after 3hr of infection  |
| AAEL009294 | phosphatidylinositol 4-kinase                       | Inositol phosphate metabolism, Phosphatidylinositol signaling system                                   | Upregulated in Moyo-D after 3hr of infection  |
| AAEL000193 | histone-lysine n-methyltransferase                  | Lysine degradation                                                                                     | Upregulated in D2S3 after 3day of infection   |
| AAEL010414 | set domain protein                                  | Lysine degradation                                                                                     | Upregulated in D2S3 after 3hr of infection    |
| AAEL005364 | adaptin, alpha/gamma/epsilon                        | Lysosome                                                                                               | Upregulated in Moyo-D after 3day of infection |
| AAEL010469 | conserved hypothetical protein                      | MAPK signaling pathway - fly                                                                           | Upregulated in Moyo-D after 3day of infection |
| AAEL003845 | Ets domain-containing protein                       | MAPK signaling pathway - fly, Dorso-ventral axis formation                                             | Upregulated in Moyo-D after 3day of infection |
| AAEL004319 | epidermal growth factor receptor                    | MAPK signaling pathway - fly, Endocytosis, Dorso-ventral axis formation                                | Upregulated in D2S3 after 3hr of infection    |

|            |                                                          |                                                                                        |                                               |
|------------|----------------------------------------------------------|----------------------------------------------------------------------------------------|-----------------------------------------------|
| AAEL013786 | growth factor receptor-bound protein                     | MAPK signaling pathway - fly, Jak-STAT signaling pathway, Dorso-ventral axis formation | Upregulated in Moyo-D after 3day of infection |
| AAEL011780 | DNA mismatch repair protein muts                         | Mismatch repair                                                                        | Upregulated in D2S3 after 3hr of infection    |
| AAEL007854 | pelota                                                   | mRNA surveillance pathway                                                              | Upregulated in D2S3 after 3hr of infection    |
| AAEL009887 | WD-repeat protein                                        | mRNA surveillance pathway                                                              | Upregulated in D2S3 after 3day of infection   |
| AAEL010940 | hypothetical protein                                     | mRNA surveillance pathway                                                              | Upregulated in Moyo-D after 3hr of infection  |
| AAEL011742 | eukaryotic peptide chain release factor subunit          | mRNA surveillance pathway                                                              | Upregulated in Moyo-D after 3hr of infection  |
| AAEL014042 | protein phosphatase pp2a regulatory subunit b            | mRNA surveillance pathway                                                              | Upregulated in D2S3 after 3hr of infection    |
| AAEL008179 | RAS homologue enriched in brain (RHEB)                   | mTOR signaling pathway                                                                 | Upregulated in D2S3 after 3hr of infection    |
| AAEL008085 | trypsin                                                  | Neuroactive ligand-receptor interaction                                                | Upregulated in D2S3 after 3day of infection   |
| AAEL008587 | glutamate receptor, ionotropic, N-methyl d-aspartate     | Neuroactive ligand-receptor interaction                                                | Upregulated in D2S3 after 3day of infection   |
| AAEL000451 | beta1,4 mannosyltransferase                              | N-Glycan biosynthesis                                                                  | Upregulated in D2S3 after 3hr of infection    |
| AAEL015631 | asparagine synthetase                                    | Nitrogen metabolism, Alanine, aspartate and glutamate metabolism                       | Upregulated in Moyo-D after 3hr of infection  |
| AAEL001887 | glutamine synthetase 1, 2 (glutamate-amonia ligase) (gs) | Nitrogen metabolism, Alanine, aspartate and glutamate metabolism,                      | Upregulated in Moyo-D after 3hr of infection  |

|            |                                         |                                                                                          |                                              |
|------------|-----------------------------------------|------------------------------------------------------------------------------------------|----------------------------------------------|
|            |                                         | Arginine and proline metabolism                                                          |                                              |
| AAEL010276 | aminomethyltransferase                  | Nitrogen metabolism, Glycine, serine and threonine metabolism, One carbon pool by folate | Upregulated in Moyo-D after 3hr of infection |
| AAEL002389 | gamma-secretase subunit aph-1           | Notch signaling pathway                                                                  | Upregulated in D2S3 after 3hr of infection   |
| AAEL004586 | histone deacetylase                     | Notch signaling pathway                                                                  | Upregulated in Moyo-D after 3hr of infection |
| AAEL006085 | methylenetetrahydrofolate dehydrogenase | One carbon pool by folate                                                                | Upregulated in Moyo-D after 3hr of infection |
| AAEL011072 | conserved hypothetical protein          | Other types of O-glycan biosynthesis                                                     | Upregulated in Moyo-D after 3hr of infection |
| AAEL002881 | NADH:ubiquinone dehydrogenase, putative | Oxidative phosphorylation                                                                | Upregulated in D2S3 after 3hr of infection   |
| AAEL008848 | ATP synthase gamma subunit              | Oxidative phosphorylation                                                                | Upregulated in Moyo-D after 3hr of infection |
| AAEL011871 | cytochrome C1                           | Oxidative phosphorylation                                                                | Upregulated in Moyo-D after 3hr of infection |
| AAEL012740 | ATPase subunit, putative                | Oxidative phosphorylation                                                                | Upregulated in D2S3 after 3hr of infection   |
| AAEL013009 | cytochrome c oxidase subunit iv         | Oxidative phosphorylation                                                                | Upregulated in Moyo-D after 3hr of infection |
| AAEL007777 | vacuolar ATP synthase subunit S1        | Oxidative phosphorylation, Phagosome, Lysosome                                           | Upregulated in Moyo-D after 3hr of infection |
| AAEL001804 | glucosyl/glucuronosyl transferases      | Pentose and glucuronate interconversions, Ascorbate and aldarate metabolism, Starch      | Upregulated in Moyo-D after 3hr of infection |

|            |                                         |                                                                                                                                                                                                                                          |                                               |
|------------|-----------------------------------------|------------------------------------------------------------------------------------------------------------------------------------------------------------------------------------------------------------------------------------------|-----------------------------------------------|
|            |                                         | and sucrose metabolism, Other types of O-glycan biosynthesis, Retinol metabolism, Porphyrin and chlorophyll metabolism, Metabolism of xenobiotics by cytochrome P450, Drug metabolism - cytochrome P450, Drug metabolism - other enzymes |                                               |
| AAEL002723 | peroxisomal membrane protein pmp34      | Peroxisome                                                                                                                                                                                                                               | Upregulated in D2S3 after 3hr of infection    |
| AAEL009112 | conserved hypothetical protein          | Peroxisome                                                                                                                                                                                                                               | Upregulated in D2S3 after 3hr of infection    |
| AAEL010461 | conserved hypothetical protein          | Peroxisome                                                                                                                                                                                                                               | Upregulated in Moyo-D after 3day of infection |
| AAEL013260 | alpha methylacyl-coa racemase           | Peroxisome                                                                                                                                                                                                                               | Upregulated in D2S3 after 3day of infection   |
| AAEL003762 | Protoporphyrinogen IX oxidase, putative | Porphyrin and chlorophyll metabolism                                                                                                                                                                                                     | Upregulated in Moyo-D after 3day of infection |
| AAEL000672 | cyclin a                                | Progesterone-mediated oocyte maturation                                                                                                                                                                                                  | Upregulated in Moyo-D after 3hr of infection  |
| AAEL008379 | P38 mapk                                | Progesterone-mediated oocyte maturation                                                                                                                                                                                                  | Upregulated in D2S3 after 3day of infection   |
| AAEL009572 | cyclin B3                               | Progesterone-mediated oocyte maturation                                                                                                                                                                                                  | Upregulated in Moyo-D after 3day of infection |
| AAEL004563 | 26S protease regulatory subunit S10b    | Proteasome                                                                                                                                                                                                                               | Upregulated in Moyo-D after 3hr of infection  |
| AAEL006061 | proteasome subunit alpha type           | Proteasome                                                                                                                                                                                                                               | Upregulated in D2S3 after 3day of infection   |

|            |                                                                                                           |                                                                             |                                               |
|------------|-----------------------------------------------------------------------------------------------------------|-----------------------------------------------------------------------------|-----------------------------------------------|
| AAEL012943 | 26S protease regulatory subunit                                                                           | Proteasome                                                                  | Upregulated in D2S3 after 3hr of infection    |
| AAEL014915 | 26S proteasome subunit                                                                                    | Proteasome                                                                  | Upregulated in D2S3 after 3hr of infection    |
| AAEL001516 | vesicle associated protein, putative                                                                      | Protein processing in endoplasmic reticulum                                 | Upregulated in Moyo-D after 3hr of infection  |
| AAEL003939 | eukaryotic translation initiation factor 2-alpha kinase 3 (pancreatic eif2-alpha kinase)                  | Protein processing in endoplasmic reticulum                                 | Upregulated in D2S3 after 3day of infection   |
| AAEL010032 | translocon-associated protein, beta subunit precursor (trap-beta) (signal sequence receptor beta subunit) | Protein processing in endoplasmic reticulum                                 | Upregulated in Moyo-D after 3day of infection |
| AAEL010798 | ubiquitin-conjugating enzyme E2 g                                                                         | Protein processing in endoplasmic reticulum, Ubiquitin mediated proteolysis | Upregulated in Moyo-D after 3hr of infection  |
| AAEL005384 | phosphoribosylformylglycinamide synthase, putative                                                        | Purine metabolism                                                           | Upregulated in D2S3 after 3hr of infection    |
| AAEL006806 | atrial natriuretic peptide receptor                                                                       | Purine metabolism                                                           | Upregulated in D2S3 after 3hr of infection    |
| AAEL014012 | membrane-associated guanylate kinase (maguk)                                                              | Purine metabolism                                                           | Upregulated in D2S3 after 3hr of infection    |
| AAEL004107 | nucleoside diphosphate kinase, putative                                                                   | Purine metabolism, Pyrimidine metabolism                                    | Upregulated in D2S3 after 3day of infection   |
| AAEL006661 | histone acetyltransferase, putative                                                                       | Purine metabolism, Pyrimidine metabolism, RNA polymerase                    | Upregulated in Moyo-D after 3hr of infection  |
| AAEL011273 | uridine cytidine kinase i                                                                                 | Pyrimidine metabolism, Drug metabolism - other enzymes                      | Upregulated in Moyo-D after 3day of infection |
| AAEL002286 | autophagy related gene                                                                                    | Regulation of autophagy                                                     | Upregulated in D2S3 after 3day of infection   |
| AAEL003165 | low molecular weight protein-tyrosine-phosphatase                                                         | Riboflavin metabolism                                                       | Upregulated in D2S3 after 3day of             |



|            |                                                             |                                   |                                               |
|------------|-------------------------------------------------------------|-----------------------------------|-----------------------------------------------|
|            |                                                             |                                   | infection                                     |
| AAEL015151 | acid phosphatase                                            | Riboflavin metabolism             | Upregulated in Moyo-D after 3day of infection |
| AAEL000010 | ribosomal protein L36, putative                             | Ribosome                          | Upregulated in Moyo-D after 3hr of infection  |
| AAEL005629 | ribosomal protein L35, putative                             | Ribosome                          | Upregulated in D2S3 after 3hr of infection    |
| AAEL005901 | 40S ribosomal protein S3a                                   | Ribosome                          | Upregulated in Moyo-D after 3hr of infection  |
| AAEL007771 | 60S ribosomal protein L22                                   | Ribosome                          | Upregulated in Moyo-D after 3day of infection |
| AAEL008188 | 60S ribosomal protein L6                                    | Ribosome                          | Upregulated in Moyo-D after 3hr of infection  |
| AAEL010299 | 40S ribosomal protein S12                                   | Ribosome                          | Upregulated in Moyo-D after 3hr of infection  |
| AAEL010821 | 60S acidic ribosomal protein P0                             | Ribosome                          | Upregulated in Moyo-D after 3day of infection |
| AAEL011656 | 40S ribosomal protein S15                                   | Ribosome                          | Upregulated in Moyo-D after 3hr of infection  |
| AAEL012686 | ribosomal protein S12, putative                             | Ribosome                          | Upregulated in Moyo-D after 3hr of infection  |
| AAEL013221 | 60S ribosomal protein L10a                                  | Ribosome                          | Upregulated in D2S3 after 3day of infection   |
| AAEL000422 | U3 small nucleolar RNA-associated protein homolog, putative | Ribosome biogenesis in eukaryotes | Upregulated in D2S3 after 3day of infection   |
| AAEL006469 | conserved hypothetical protein                              | Ribosome biogenesis in eukaryotes | Upregulated in Moyo-D after 3hr of infection  |
| AAEL006610 | conserved hypothetical protein                              | Ribosome biogenesis in eukaryotes | Upregulated in Moyo-D after 3day of infection |
| AAEL008592 | ribonuclease iii                                            | Ribosome biogenesis in eukaryotes | Upregulated in Moyo-D after 3hr of infection  |

|            |                                                                                                                     |                                   |                                               |
|------------|---------------------------------------------------------------------------------------------------------------------|-----------------------------------|-----------------------------------------------|
| AAEL008865 | oligoribonuclease, mitochondrial                                                                                    | Ribosome biogenesis in eukaryotes | Upregulated in Moyo-D after 3hr of infection  |
| AAEL000262 | conserved hypothetical protein                                                                                      | RNA degradation                   | Upregulated in D2S3 after 3hr of infection    |
| AAEL005564 | ubiquitin specific protease 52 / poly(A) ribonuclease subunit pan2                                                  | RNA degradation                   | Upregulated in D2S3 after 3hr of infection    |
| AAEL006697 | conserved hypothetical protein                                                                                      | RNA degradation                   | Upregulated in Moyo-D after 3day of infection |
| AAEL012874 | rrp4                                                                                                                | RNA degradation                   | Upregulated in Moyo-D after 3hr of infection  |
| AAEL002334 | Eukaryotic translation initiation factor 3 subunit E (eIF3e)(Eukaryotic translation initiation factor 3 subunit 6)  | RNA transport                     | Upregulated in D2S3 after 3day of infection   |
| AAEL004378 | eukaryotic translation initiation factor 1A (eIF-1A)                                                                | RNA transport                     | Upregulated in Moyo-D after 3hr of infection  |
| AAEL005635 | nucleoporin                                                                                                         | RNA transport                     | Upregulated in Moyo-D after 3hr of infection  |
| AAEL007078 | Eukaryotic translation initiation factor 3 subunit A (eIF3a)(Eukaryotic translation initiation factor 3 subunit 10) | RNA transport                     | Upregulated in Moyo-D after 3day of infection |
| AAEL008557 | conserved hypothetical protein                                                                                      | RNA transport                     | Upregulated in D2S3 after 3day of infection   |
| AAEL009101 | Eukaryotic translation initiation factor 3 subunit F (eIF3f)(Eukaryotic translation initiation factor 3 subunit 5)  | RNA transport                     | Upregulated in D2S3 after 3day of infection   |
| AAEL009399 | conserved hypothetical protein                                                                                      | RNA transport                     | Upregulated in D2S3 after 3hr of infection    |
| AAEL014388 | conserved hypothetical protein                                                                                      | RNA transport                     | Upregulated in D2S3 after 3hr of infection    |
| AAEL014733 | nuclear pore complex protein nup214                                                                                 | RNA transport                     | Upregulated in Moyo-D after 3hr of infection  |
| AAEL010598 | conserved hypothetical protein                                                                                      | RNA transport,                    | Upregulated in                                |

|            |                                                |                                                             |                                               |
|------------|------------------------------------------------|-------------------------------------------------------------|-----------------------------------------------|
|            |                                                | mRNA surveillance pathway                                   | D2S3 after 3hr of infection                   |
| AAEL011817 | nonsense-mediated mRNA decay protein 1 (rent1) | RNA transport, mRNA surveillance pathway                    | Upregulated in Moyo-D after 3hr of infection  |
| AAEL010318 | polyadenylate-binding protein                  | RNA transport, mRNA surveillance pathway, RNA degradation   | Upregulated in D2S3 after 3hr of infection    |
| AAEL009646 | conserved hypothetical protein                 | RNA transport, mTOR signaling pathway                       | Upregulated in Moyo-D after 3hr of infection  |
| AAEL008849 | selenophosphate synthase                       | Selenocompound metabolism                                   | Upregulated in Moyo-D after 3day of infection |
| AAEL014321 | glucosylceramidase                             | Sphingolipid metabolism, Other glycan degradation, Lysosome | Upregulated in Moyo-D after 3hr of infection  |
| AAEL011233 | SM protein G, putative                         | Spliceosome                                                 | Upregulated in Moyo-D after 3hr of infection  |
| AAEL005355 | small nuclear ribonucleoprotein sm             | Spliceosome, RNA degradation                                | Upregulated in Moyo-D after 3hr of infection  |
| AAEL015199 | WD-repeat protein                              | Spliceosome, Ubiquitin mediated proteolysis                 | Upregulated in Moyo-D after 3hr of infection  |
| AAEL012297 | sterol desaturase                              | Steroid biosynthesis                                        | Upregulated in Moyo-D after 3hr of infection  |
| AAEL009221 | conserved hypothetical protein                 | Taurine and hypotaurine metabolism                          | Upregulated in Moyo-D after 3hr of infection  |
| AAEL009110 | smad anchor for receptor activation            | TGF-beta signaling pathway, Endocytosis                     | Upregulated in Moyo-D after 3hr of infection  |
| AAEL004435 | kynurenine aminotransferase                    | Tryptophan metabolism, Selenocompound metabolism            | Upregulated in D2S3 after 3day of infection   |
| AAEL000758 | ubiquitin-activating enzyme E1                 | Ubiquitin mediated proteolysis                              | Upregulated in D2S3 after 3hr of              |

|            |                                                                                  |                                            |                                               |
|------------|----------------------------------------------------------------------------------|--------------------------------------------|-----------------------------------------------|
|            |                                                                                  |                                            | infection                                     |
| AAEL004121 | ubiquitin-conjugating enzyme E2 q                                                | Ubiquitin mediated proteolysis             | Upregulated in D2S3 after 3hr of infection    |
| AAEL005820 | hect E3 ubiquitin ligase                                                         | Ubiquitin mediated proteolysis             | Upregulated in D2S3 after 3hr of infection    |
| AAEL006291 | cullin                                                                           | Ubiquitin mediated proteolysis             | Upregulated in D2S3 after 3day of infection   |
| AAEL009026 | ubiquitin-conjugating enzyme m                                                   | Ubiquitin mediated proteolysis             | Upregulated in Moyo-D after 3day of infection |
| AAEL009074 | Inhibitor of Apoptosis (IAP) containing Baculoviral IAP Repeat(s) (BIR domains). | Ubiquitin mediated proteolysis             | Upregulated in D2S3 after 3day of infection   |
| AAEL012435 | tripartite motif protein                                                         | Ubiquitin mediated proteolysis             | Upregulated in Moyo-D after 3day of infection |
| AAEL013633 | ubiquitin-conjugating enzyme h                                                   | Ubiquitin mediated proteolysis             | Upregulated in D2S3 after 3hr of infection    |
| AAEL009324 | hydroxyacyl dehydrogenase                                                        | Valine, leucine and isoleucine degradation | Upregulated in D2S3 after 3hr of infection    |

## Online Resource 6

| cDNA ID | VectorBase Gene ID (or GenBank Accession) | D2S3/ MoyoD | Moyo-S /Moyo-D | Gene Description                                                   |
|---------|-------------------------------------------|-------------|----------------|--------------------------------------------------------------------|
| NAAF116 | DV277747                                  | 0.522403    | 0.322403       | unknown                                                            |
| NAAGW30 | AAEL009819                                | 2.18781     | 2.50781        | hypothetical protein                                               |
| NAAHL45 | AAEL007125                                | 1.277813    | 1.597813       | PET117 polypeptide, putative                                       |
| NABQD57 | DV304640                                  | 0.347623    | 0.147623       | unknown                                                            |
| NABQF83 | AAEL005564                                | 0.740672    | 0.540672       | ubiquitin specific protease 52 / poly(A) ribonuclease subunit pan2 |
| NABRR40 | DV323917                                  | 0.734242    | 0.534242       | unknown                                                            |
| NABRT95 | AAEL011830                                | 1.047919    | 1.367919       | methylthioribulose-1-phosphate dehydratase (MTRu-1-P dehydratase)  |
| NABXE43 | AAEL009112                                | 0.993698    | 0.793698       | conserved hypothetical protein                                     |
| NACA981 | AAEL009082                                | 1.480306    | 1.280306       | hypothetical protein                                               |
| NACM149 | DV374880                                  | 0.11598     | 0.08402        | unknown                                                            |
| NADAE29 | AAEL012686                                | 0.135158    | 0.455158       | ribosomal protein S12, putative                                    |
| NADBC39 | AAEL013874                                | 0.561524    | 0.881524       | hypothetical protein                                               |
| NADD620 | AAEL010299                                | 1.468426    | 1.268426       | 40S ribosomal protein S12                                          |
| NAAF122 | AAEL011103                                | 1.437688    | 1.237688       | centromere/kinetochore protein zw10                                |
| NAAHI08 | AAEL012816                                | 0.951082    | 0.751082       | conserved hypothetical protein                                     |
| NABM742 | DV298463                                  | 1.164715    | 1.484715       | unknown                                                            |
| NABNS81 | AAEL001356                                | 0.561427    | 0.361427       | RNA-binding protein                                                |
| NABOA70 | AAEL007973                                | 0.201336    | 0.001336       | hypothetical protein                                               |
| NABOL89 | AAEL006667                                | 1.549896    | 1.349896       | phosphatidyltransferase                                            |
| NACAF29 | AAEL012064                                | 1.217489    | 1.537489       | Niemann-Pick Type C-2, putative                                    |
| NADCX10 | AAEL006573                                | 2.232261    | 2.552261       | conserved hypothetical protein                                     |
| NAAF530 | AAEL015014                                | 0.353806    | 0.153806       | conserved hypothetical protein                                     |
| NABMY53 | AAEL009529                                | 1.043885    | 0.843885       | hypothetical protein                                               |
| NABQ789 | AAEL012143                                | 0.209165    | 0.009165       | Caspase (Short).                                                   |
| NABQD40 | AAEL011993                                | 0.576366    | 0.896366       | conserved hypothetical protein                                     |
| NABRM26 | AAEL007767                                | 1.414915    | 1.214915       | Protein kintoun                                                    |
| NABS645 | AAEL011399                                | 0.762057    | 0.562057       | conserved hypothetical protein                                     |
| NABW385 | DV347817                                  | 0.10302     | 0.09698        | unknown                                                            |
| NABW481 | DV347970                                  | 0.775778    | 1.095778       | unknown                                                            |
| NABW889 | AAEL011387                                | 0.37378     | 0.69378        | leucine-rich repeat                                                |
| NABZE01 | AAEL008184                                | 0.868202    | 0.668202       | conserved hypothetical protein                                     |
| NACAC05 | DV360301                                  | 1.431155    | 1.231155       | unknown                                                            |
| NACBB07 | AAEL011288                                | 1.445112    | 1.245112       | elongation factor 1 gamma                                          |
| NACBT40 | AAEL004586                                | 1.280655    | 1.600655       | histone deacetylase                                                |

|         |            |          |          |                                                                                              |
|---------|------------|----------|----------|----------------------------------------------------------------------------------------------|
| NACM460 | DV375386   | 0.666234 | 0.466234 | unknown                                                                                      |
| NADB255 | DV393840   | 1.111922 | 0.911922 | unknown                                                                                      |
| NADCC48 | DV435783   | 0.732964 | 0.532964 | unknown                                                                                      |
| NADCE32 | AAEL013402 | 0.485654 | 0.805654 | hypothetical protein                                                                         |
| NADCU87 | AAEL000828 | 1.545139 | 1.865139 | vitellogenin,, putative                                                                      |
| NADCY19 | AAEL001906 | 0.118966 | 0.08103  | pnuts protein                                                                                |
| NADDS01 | AAEL011305 | 1.076682 | 0.876682 | hypothetical protein                                                                         |
| NADE131 | AAEL004938 | 1.585403 | 1.385403 | hypothetical protein                                                                         |
| NAAF529 | AAEL000193 | 0.580811 | 0.900811 | histone-lysine n-methyltransferase                                                           |
| NAAF715 | AAEL007322 | 0.637243 | 0.437243 | phosphatidate phosphatase                                                                    |
| NAAHC86 | DV275893   | 0.012374 | 0.187626 | unknown                                                                                      |
| NAAI753 | AAEL003939 | 0.958148 | 0.758148 | eukaryotic translation initiation factor 2-<br>alpha kinase 3 (pancreatic eif2-alpha kinase) |
| NABMV71 | DV305971   | 1.222135 | 1.542135 | unknown                                                                                      |
| NABQ611 | AAEL002286 | 0.333564 | 0.653564 | autophagy related gene                                                                       |
| NABUG84 | DV339129   | 0.387909 | 0.187909 | unknown                                                                                      |
| NABW840 | AAEL010674 | 0.544602 | 0.344602 | hypothetical protein                                                                         |
| NACA257 | DV364158   | 0.823104 | 0.623104 | unknown                                                                                      |
| NACM430 | AAEL003698 | 1.704807 | 2.024807 | conserved hypothetical protein                                                               |
